# Supplementary material for: Quality Evaluation Algorithm for Chest Compressions Based on OpenPose Model
Source: MDPI journal article supplement (doi:10.3390/app12104847), 2022-05-11
Supplement: s1 [file s1]

Archive with 3 entries (3 files):
- applsci-1656947-supplementary-figures.pdf
- test_python_output.pdf
- Video S1--A test video of CCs.mp4
