# Supplementary material for: Quality Evaluation Algorithm for Chest Compressions Based on OpenPose Model
Source: MDPI journal article supplement (doi:10.3390/app12104847), 2022-05-11
Supplement: s1 [file s1 › applsci-1656947-supplementary-figures.pdf]

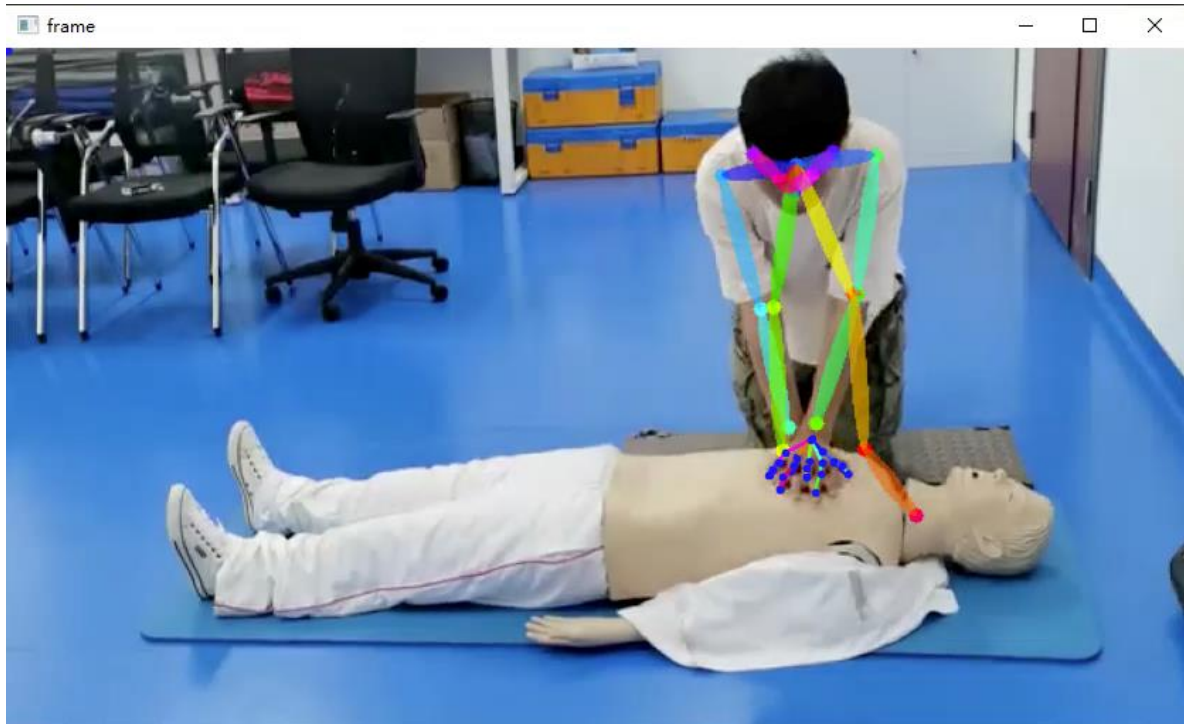

**Figure S1.** A frame of CCs video processed by OpenPose model.

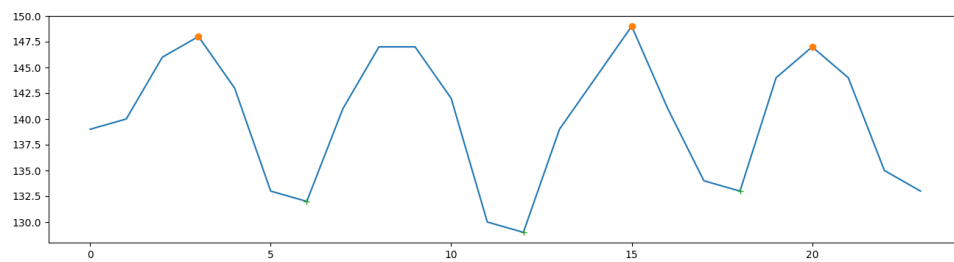

**Figure S2.** An output curve drawn by the plt.plot function.
