# Supplementary material for: Quality Evaluation Algorithm for Chest Compressions Based on OpenPose Model
Source: MDPI journal article supplement (doi:10.3390/app12104847), 2022-05-11
Supplement: s1 [file s1 › test_python_output.pdf]

```

D:\Python\Python39\python.exe F:/pytorch-openpose-
master/pytorch-openpose-master/demo_video1.py F:/
pytorch-openpose-master/pytorch-openpose-master/
demo_video/07.mp4
['ffprobe', '-v', 'quiet', '-print_format', 'json', '-
show_format', '-show_streams', 'F:/pytorch-openpose-
master/pytorch-openpose-master/demo_video/07.mp4']
CompletedProcess(args=['ffprobe', '-v', 'quiet', '-
print_format', 'json', '-show_format', '-show_streams
', 'F:/pytorch-openpose-master/pytorch-openpose-master/
demo_video/07.mp4'], returncode=0, stdout='{
  "streams": [
    {
      "index": 0,
      "codec_name": "h264",
      "codec_long_name": "H.264 / AVC / MPEG-4 AVC / MPEG-4
part 10",
      "profile": "High",
      "codec_type": "video",
      "codec_tag_string": "avc1",
      "codec_tag": "0x31637661",
      "width": 640,
      "height": 368,
      "coded_width": 640,
      "coded_height": 368,
      "closed_captions": 0,
      "has_b_frames": 2,
      "sample_aspect_ratio": "46:45",
      "display_aspect_ratio": "16:9",
      "pix_fmt": "yuv420p",
      "level": 30,
      "chroma_location": "left",
      "refs": 1,
      "is_avc": "true",
      "nal_length_size": 4,
      "r_frame_rate": "24/1",
      "avg_frame_rate": "24/1",
      "time_base": "1/12288",
      "start_pts": 0,
      "start_time": "0.000000",
      "duration_ts": 25088,
      "duration": "2.041667",
      "bit_rate": 322019,
      "bits_per_raw_sample": 8,
      "nb_frames": 49,
      "disposition": {
        "default": 1,
        "dub": 0,
        "original": 0,
        "comment": 0,
        "lyrics": 0,
        "karaoke": 0,
        "forced": 0,
        "hearing_impaired": 0,
        "visual_impaired": 0,
        "clean_effects": 0
      }
    }
  ]
}
```

```

        "attached_pic": 0,\n
timed_thumbnails": 0,\n        "captions": 0,\n
        "descriptions": 0,\n
metadata": 0,\n        "dependent": 0,\n
        "still_image": 0\n    },\n
    "tags": {\n        "language": "und
",\n        "handler_name": "VideoHandler",\n
        "vendor_id": "[0][0][0][0]"
    },\n
index": 1,\n        "codec_name": "aac",\n
        "codec_long_name": "AAC (Advanced Audio
Coding)",\n        "profile": "LC",
codec_type": "audio",\n        "codec_tag_string
": "mp4a",\n        "codec_tag": "0x6134706d",\n
        "sample_fmt": "fltp",\n
sample_rate": "44100",\n        "channels": 2,\n
        "channel_layout": "stereo",\n
bits_per_sample": 0,\n        "r_frame_rate": "0/0
",\n        "avg_frame_rate": "0/0",\n
time_base": "1/44100",\n        "start_pts": 0,\n
        "start_time": "0.000000",\n
duration_ts": 87009,\n        "duration": "1.972993
",\n        "bit_rate": "127845",\n
nb_frames": "86",\n        "disposition": {\n
        "default": 1,\n        "dub": 0
,\n        "original": 0,\n
comment": 0,\n        "lyrics": 0,\n
        "karaoke": 0,\n        "forced
": 0,\n        "hearing_impaired": 0,\n
        "visual_impaired": 0,\n
        "clean_effects": 0,\n
attached_pic": 0,\n        "timed_thumbnails":
0,\n        "captions": 0,\n
descriptions": 0,\n        "metadata": 0,\n
        "dependent": 0,\n
still_image": 0\n    },\n        "tags": {\n
        "language": "und",\n
handler_name": "SoundHandler",\n
vendor_id": "[0][0][0][0]"
    },\n        "format": {\n        "filename": "F:/
pytorch-openpose-master/pytorch-openpose-master/

```

```

demo_video/07.mp4",\n          "nb_streams": 2,\n          "nb_programs": 0,\n          "format_name": "mov,\nmp4,m4a,3gp,3g2,mj2",\n          "format_long_name": "\n\nQuickTime / MOV",\n          "start_time": "0.000000",\n          "duration": "2.042000",\n          "size": "117021",\n          "bit_rate": "458456",\n          "probe_score": 100,\n          "tags": {\n          "major_brand": "isom",\n          "minor_version": "512",\n          "compatible_brands": "isomiso2avc1mp41",\n          "encoder": "Lavf58.20.100"\n          }\n          }\n          }, stderr='')
[[4.240000000e+02 7.400000000e+01 9.91722524e-01 0.000000000e+00]
 [4.250000000e+02 6.300000000e+01 9.32638943e-01 1.000000000e+00]
 [3.850000000e+02 6.800000000e+01 8.96789014e-01 2.000000000e+00]
 [4.060000000e+02 1.380000000e+02 9.53575969e-01 3.000000000e+00]
 [4.220000000e+02 2.050000000e+02 7.45099783e-01 4.000000000e+00]
 [4.680000000e+02 5.800000000e+01 9.20875311e-01 5.000000000e+00]
 [4.560000000e+02 1.330000000e+02 8.46438289e-01 6.000000000e+00]
 [4.360000000e+02 2.030000000e+02 8.58564794e-01 7.000000000e+00]
 [4.150000000e+02 1.390000000e+02 6.59747243e-01 8.000000000e+00]
 [3.220000000e+02 2.500000000e+02 3.41270268e-01 9.000000000e+00]
 [4.180000000e+02 2.180000000e+02 3.73191774e-01 1.000000000e+01]
 [2.300000000e+02 2.510000000e+02 1.48645997e-01 1.100000000e+01]
 [1.360000000e+02 2.780000000e+02 3.76337051e-01 1.200000000e+01]
 [4.590000000e+02 1.330000000e+02 7.03573346e-01 1.300000000e+01]
 [3.220000000e+02 2.510000000e+02 2.62925267e-01 1.400000000e+01]

```

```

[4.65000000e+02 2.18000000e+02 6.73134387e-01 1.
50000000e+01]
[2.27000000e+02 2.53000000e+02 1.15671575e-01 1.
60000000e+01]
[4.75000000e+02 2.13000000e+02 1.20527193e-01 1.
70000000e+01]
[1.52000000e+02 2.45000000e+02 2.47637123e-01 1.
80000000e+01]
[4.93000000e+02 2.54000000e+02 1.28930554e-01 1.
90000000e+01]
[1.33000000e+02 2.78000000e+02 2.76426077e-01 2.
00000000e+01]
[4.14000000e+02 6.60000000e+01 9.14781988e-01 2.
10000000e+01]
[4.33000000e+02 6.50000000e+01 9.24337745e-01 2.
20000000e+01]
[4.03000000e+02 5.40000000e+01 6.27701938e-01 2.
30000000e+01]
[4.44000000e+02 5.40000000e+01 7.55005479e-01 2.
40000000e+01]]
[[ 0.          1.          2.          3.          4
.          5.
 6.          7.          8.          10.         -1
.          13.
 15.         19.         21.         22.         23
.          24.
 27.08158191 17.        ]]
[array([385., 68.]), array([406., 138.]), array([422
., 205.]), array([468., 58.]), array([456., 133.]),
array([436., 203.])]
Right_elbow: STANDARD

Left_elbow: STANDARD

write is none
posed_frame is <class 'numpy.ndarray'>
ffmpeg version 2021-07-04-git-301d275301-full_build-www
.gyan.dev Copyright (c) 2000-2021 the FFmpeg developers
  built with gcc 10.3.0 (Rev2, Built by MSYS2 project)
  configuration: --enable-gpl --enable-version3 --
enable-static --disable-w32threads --disable-autodetect

```

```

--enable-fontconfig --enable-iconv --enable-gnutls --
enable-libxml2 --enable-gmp --enable-lzma --enable-
libsnappp --enable-zlib --enable-librist --enable-
libsrt --enable-libssh --enable-libzmq --enable-
avisynth --enable-libbluray --enable-libcaca --enable-
sdl2 --enable-libdav1d --enable-libzvbi --enable-
librav1e --enable-libsvtav1 --enable-libwebp --enable-
libx264 --enable-libx265 --enable-libxvid --enable-
libaom --enable-libopenjpeg --enable-libvpx --enable-
libass --enable-frei0r --enable-libfreetype --enable-
libfribidi --enable-libvidstab --enable-libvmaf --
enable-libzimg --enable-amf --enable-cuda-llvm --enable-
-cuvid --enable-ffnvcodec --enable-nvdec --enable-nvenc
--enable-d3d11va --enable-dxva2 --enable-libmfx --
enable-libglslang --enable-vulkan --enable-openc1 --
enable-libcdio --enable-libgme --enable-libmodplug --
enable-libopenmpt --enable-libopencore-amrwb --enable-
libmp3lame --enable-libshine --enable-libtheora --
enable-libtwolame --enable-libvo-amrwbenc --enable-
libilbc --enable-libgsm --enable-libopencore-amrnb --
enable-libopus --enable-libspeex --enable-libvorbis --
enable-ladspa --enable-libbs2b --enable-libflite --
enable-libmysofa --enable-librubberband --enable-
libsoxr --enable-chromaprint
libavutil      57.  0.100 / 57.  0.100
libavcodec     59.  3.100 / 59.  3.100
libavformat    59.  4.100 / 59.  4.100
libavdevice    59.  0.100 / 59.  0.100
libavfilter     8.  0.103 /  8.  0.103
libswscale     6.  0.100 /  6.  0.100
libswresample  4.  0.100 /  4.  0.100
libpostproc   56.  0.100 / 56.  0.100
[[4.230000000e+02 7.600000000e+01 9.72078979e-01 0.
000000000e+00]
[4.260000000e+02 6.300000000e+01 9.28873181e-01 1.
000000000e+00]
[3.860000000e+02 6.800000000e+01 9.07547593e-01 2.
000000000e+00]
[4.060000000e+02 1.400000000e+02 9.47827280e-01 3.
000000000e+00]
[4.230000000e+02 2.050000000e+02 7.34443367e-01 4.

```

```

00000000e+00]
[4.68000000e+02 5.80000000e+01 9.29951787e-01 5.
00000000e+00]
[4.55000000e+02 1.39000000e+02 8.45038295e-01 6.
00000000e+00]
[4.37000000e+02 2.04000000e+02 8.67481828e-01 7.
00000000e+00]
[4.16000000e+02 1.42000000e+02 6.64132237e-01 8.
00000000e+00]
[3.22000000e+02 2.51000000e+02 2.30071992e-01 9.
00000000e+00]
[4.20000000e+02 2.22000000e+02 3.80655676e-01 1.
00000000e+01]
[1.37000000e+02 2.78000000e+02 3.31669360e-01 1.
10000000e+01]
[4.60000000e+02 1.37000000e+02 7.12058127e-01 1.
20000000e+01]
[3.22000000e+02 2.49000000e+02 1.49573579e-01 1.
30000000e+01]
[4.64000000e+02 2.21000000e+02 6.57888234e-01 1.
40000000e+01]
[4.75000000e+02 2.16000000e+02 1.21926360e-01 1.
50000000e+01]
[1.51000000e+02 2.48000000e+02 2.29684040e-01 1.
60000000e+01]
[1.50000000e+02 2.49000000e+02 2.30082661e-01 1.
70000000e+01]
[4.92000000e+02 2.55000000e+02 1.27777815e-01 1.
80000000e+01]
[1.33000000e+02 2.79000000e+02 3.23800176e-01 1.
90000000e+01]
[4.13000000e+02 6.80000000e+01 9.20773149e-01 2.
00000000e+01]
[4.33000000e+02 6.70000000e+01 9.30461407e-01 2.
10000000e+01]
[4.02000000e+02 5.60000000e+01 5.52932203e-01 2.
20000000e+01]
[4.44000000e+02 5.50000000e+01 7.44525552e-01 2.
30000000e+01]]
[[ 0.          1.          2.          3.          4
.          5.

```

```

    6.          7.          8.          10.          -1
.          12.
    14.          18.          20.          21.          22
.          23.
    26.89824863 17.          ]]
[array([386., 68.]), array([406., 140.]), array([423
., 205.]), array([468., 58.]), array([455., 139.]),
array([437., 204.])]
Right_elbow: STANDARD

Left_elbow: STANDARD

posed_frame is <class 'numpy.ndarray'>
[[4.25000000e+02 8.10000000e+01 9.85653877e-01 0.
00000000e+00]
 [4.26000000e+02 6.50000000e+01 9.09880400e-01 1.
00000000e+00]
 [3.87000000e+02 6.90000000e+01 9.23859656e-01 2.
00000000e+00]
 [4.06000000e+02 1.42000000e+02 9.28548217e-01 3.
00000000e+00]
 [4.23000000e+02 2.08000000e+02 7.13318110e-01 4.
00000000e+00]
 [4.69000000e+02 6.00000000e+01 9.20325816e-01 5.
00000000e+00]
 [4.56000000e+02 1.40000000e+02 8.69303405e-01 6.
00000000e+00]
 [4.37000000e+02 2.07000000e+02 8.87320697e-01 7.
00000000e+00]
 [4.15000000e+02 1.42000000e+02 6.60559773e-01 8.
00000000e+00]
 [3.21000000e+02 2.51000000e+02 2.03658253e-01 9.
00000000e+00]
 [4.21000000e+02 2.23000000e+02 3.97564352e-01 1.
00000000e+01]
 [1.38000000e+02 2.78000000e+02 3.44056696e-01 1.
10000000e+01]
 [4.60000000e+02 1.38000000e+02 7.13232636e-01 1.
20000000e+01]
 [3.21000000e+02 2.50000000e+02 1.23446248e-01 1.
30000000e+01]
```

```

[4.63000000e+02 2.24000000e+02 6.50111735e-01 1.
40000000e+01]
[1.50000000e+02 2.50000000e+02 2.24045008e-01 1.
50000000e+01]
[4.97000000e+02 2.55000000e+02 1.89766213e-01 1.
60000000e+01]
[1.34000000e+02 2.79000000e+02 3.21392387e-01 1.
70000000e+01]
[4.16000000e+02 7.20000000e+01 9.63248730e-01 1.
80000000e+01]
[4.34000000e+02 7.10000000e+01 9.81320918e-01 1.
90000000e+01]
[4.04000000e+02 5.90000000e+01 6.86188281e-01 2.
00000000e+01]
[4.47000000e+02 5.80000000e+01 6.74236119e-01 2.
10000000e+01]]
[[ 0.          1.          2.          3.          4
.          5.
  6.          7.          8.          10.         -1
.          12.
  14.         16.         18.         19.         20
.          21.
 27.12718439 17.          ]]
[array([387., 69.]), array([406., 142.]), array([423
., 208.]), array([469., 60.]), array([456., 140.]),
array([437., 207.])]
Right_elbow: STANDARD

Left_elbow: STANDARD

posed_frame is <class 'numpy.ndarray'>
[[4.25000000e+02 8.50000000e+01 9.86645401e-01 0.
00000000e+00]
[4.25000000e+02 6.90000000e+01 9.42263365e-01 1.
00000000e+00]
[3.87000000e+02 7.20000000e+01 9.30861056e-01 2.
00000000e+00]
[4.08000000e+02 1.48000000e+02 8.98615062e-01 3.
00000000e+00]
[4.24000000e+02 2.11000000e+02 7.47127056e-01 4.
00000000e+00]

```

```

[4.68000000e+02 6.30000000e+01 8.95505071e-01 5.
00000000e+00]
[4.58000000e+02 1.40000000e+02 8.44628811e-01 6.
00000000e+00]
[4.39000000e+02 2.09000000e+02 8.90894413e-01 7.
00000000e+00]
[4.14000000e+02 1.45000000e+02 6.42488122e-01 8.
00000000e+00]
[3.24000000e+02 2.52000000e+02 1.52126133e-01 9.
00000000e+00]
[4.21000000e+02 2.25000000e+02 4.11254108e-01 1.
00000000e+01]
[1.39000000e+02 2.77000000e+02 2.97361612e-01 1.
10000000e+01]
[1.38000000e+02 2.78000000e+02 2.97639251e-01 1.
20000000e+01]
[4.57000000e+02 1.40000000e+02 6.87136769e-01 1.
30000000e+01]
[4.59000000e+02 2.25000000e+02 6.13440871e-01 1.
40000000e+01]
[1.48000000e+02 2.52000000e+02 2.21047208e-01 1.
50000000e+01]
[4.91000000e+02 2.58000000e+02 1.50117487e-01 1.
60000000e+01]
[1.33000000e+02 2.79000000e+02 3.61130416e-01 1.
70000000e+01]
[4.17000000e+02 7.60000000e+01 9.12735581e-01 1.
80000000e+01]
[4.33000000e+02 7.50000000e+01 9.34899390e-01 1.
90000000e+01]
[4.04000000e+02 6.60000000e+01 6.17633700e-01 2.
00000000e+01]
[4.44000000e+02 6.40000000e+01 6.93554759e-01 2.
10000000e+01]]
[[ 0.          1.          2.          3.          4
.          5.
6.          7.          8.          10.         -1
.          13.
14.         16.         18.         19.         20
.          21.
26.55342132 17.      ]]
```

```
[array([387., 72.]), array([408., 148.]), array([424
., 211.]), array([468., 63.]), array([458., 140.]),
array([439., 209.]])
```

Right\_elbow: STANDARD

Left\_elbow: STANDARD

posed\_frame is <class 'numpy.ndarray'>

```
[[4.25000000e+02 8.80000000e+01 9.71280217e-01 0.
00000000e+00]
```

```
 [4.26000000e+02 7.30000000e+01 9.68919456e-01 1.
00000000e+00]
```

```
 [3.86000000e+02 7.70000000e+01 9.09046531e-01 2.
00000000e+00]
```

```
 [4.09000000e+02 1.53000000e+02 9.27742004e-01 3.
00000000e+00]
```

```
 [4.25000000e+02 2.15000000e+02 7.95421660e-01 4.
00000000e+00]
```

```
 [4.69000000e+02 6.70000000e+01 8.92894566e-01 5.
00000000e+00]
```

```
 [4.59000000e+02 1.43000000e+02 8.51026058e-01 6.
00000000e+00]
```

```
 [4.41000000e+02 2.12000000e+02 8.48314166e-01 7.
00000000e+00]
```

```
 [4.15000000e+02 1.49000000e+02 5.70446789e-01 8.
00000000e+00]
```

```
 [3.25000000e+02 2.51000000e+02 1.31599635e-01 9.
00000000e+00]
```

```
 [4.22000000e+02 2.26000000e+02 3.59947920e-01 1.
00000000e+01]
```

```
 [1.38000000e+02 2.78000000e+02 3.15076411e-01 1.
10000000e+01]
```

```
 [4.57000000e+02 1.43000000e+02 6.59029245e-01 1.
20000000e+01]
```

```
 [4.60000000e+02 2.27000000e+02 6.20064557e-01 1.
30000000e+01]
```

```
 [1.49000000e+02 2.51000000e+02 2.20175117e-01 1.
40000000e+01]
```

```
 [1.48000000e+02 2.52000000e+02 2.19845831e-01 1.
50000000e+01]
```

```
 [4.91000000e+02 2.61000000e+02 1.27306268e-01 1.
```

```

600000000e+01]
[4.90000000e+02 2.62000000e+02 1.27356648e-01 1.
700000000e+01]
[1.33000000e+02 2.79000000e+02 3.43506902e-01 1.
800000000e+01]
[4.18000000e+02 8.10000000e+01 8.79706502e-01 1.
900000000e+01]
[4.34000000e+02 8.00000000e+01 9.15954828e-01 2.
000000000e+01]
[4.05000000e+02 7.00000000e+01 5.86434662e-01 2.
100000000e+01]
[4.44000000e+02 6.90000000e+01 7.37426043e-01 2.
200000000e+01]]
[[ 0.          1.          2.          3.          4
.          5.
 6.          7.          8.          10.         -1
.          12.
 13.         17.         19.         20.         21
.          22.
 26.4486701 17.          ]]
[array([386., 77.]), array([409., 153.]), array([425
., 215.]), array([469., 67.]), array([459., 143.]),
array([441., 212.])]
Right_elbow: STANDARD

Left_elbow: STANDARD

posed_frame is <class 'numpy.ndarray'>
[[4.24000000e+02 9.10000000e+01 9.85430360e-01 0.
00000000e+00]
[4.26000000e+02 7.60000000e+01 9.55616474e-01 1.
00000000e+00]
[3.87000000e+02 8.10000000e+01 8.96947503e-01 2.
00000000e+00]
[4.10000000e+02 1.56000000e+02 8.84073436e-01 3.
00000000e+00]
[4.25000000e+02 2.17000000e+02 7.60135949e-01 4.
00000000e+00]
[4.68000000e+02 7.00000000e+01 8.92025113e-01 5.
00000000e+00]
[4.59000000e+02 1.46000000e+02 8.47573519e-01 6.

```

```

00000000e+00]
[4.39000000e+02 2.15000000e+02 8.81671190e-01 7.
00000000e+00]
[4.14000000e+02 1.50000000e+02 5.82906663e-01 8.
00000000e+00]
[3.24000000e+02 2.49000000e+02 1.14339188e-01 9.
00000000e+00]
[4.22000000e+02 2.27000000e+02 3.70870084e-01 1.
00000000e+01]
[1.38000000e+02 2.78000000e+02 3.08851421e-01 1.
10000000e+01]
[4.58000000e+02 1.44000000e+02 6.69231057e-01 1.
20000000e+01]
[4.60000000e+02 2.28000000e+02 6.30589306e-01 1.
30000000e+01]
[4.91000000e+02 2.56000000e+02 1.25320181e-01 1.
40000000e+01]
[1.33000000e+02 2.79000000e+02 3.45376253e-01 1.
50000000e+01]
[4.16000000e+02 8.30000000e+01 9.27070916e-01 1.
60000000e+01]
[4.34000000e+02 8.30000000e+01 9.48662758e-01 1.
70000000e+01]
[4.03000000e+02 7.10000000e+01 6.04079247e-01 1.
80000000e+01]
[4.45000000e+02 7.10000000e+01 7.40235806e-01 1.
90000000e+01]]
[[ 0.          1.          2.          3.          4
.          5.
 6.          7.          8.          10.         -1
.          12.
 13.         14.          16.          17.         18
.          19.
 26.80608589 17.          ]]
[array([387., 81.]), array([410., 156.]), array([425
., 217.]), array([468., 70.]), array([459., 146.]),
array([439., 215.])]
Right_elbow: STANDARD

Left_elbow: STANDARD

```

```

posed_frame is <class 'numpy.ndarray'>
[[4.24000000e+02 9.30000000e+01 9.69866514e-01 0.
 00000000e+00]
 [4.26000000e+02 7.70000000e+01 9.41911638e-01 1.
 00000000e+00]
 [3.87000000e+02 8.30000000e+01 9.06993270e-01 2.
 00000000e+00]
 [4.10000000e+02 1.57000000e+02 8.88558507e-01 3.
 00000000e+00]
 [4.26000000e+02 2.18000000e+02 7.49087751e-01 4.
 00000000e+00]
 [4.69000000e+02 7.10000000e+01 9.06740189e-01 5.
 00000000e+00]
 [4.59000000e+02 1.48000000e+02 8.35220039e-01 6.
 00000000e+00]
 [4.39000000e+02 2.17000000e+02 8.85792792e-01 7.
 00000000e+00]
 [4.15000000e+02 1.52000000e+02 6.00456297e-01 8.
 00000000e+00]
 [4.23000000e+02 2.30000000e+02 4.07851487e-01 9.
 00000000e+00]
 [1.41000000e+02 2.75000000e+02 2.50441134e-01 1.
 00000000e+01]
 [1.40000000e+02 2.76000000e+02 2.50693530e-01 1.
 10000000e+01]
 [4.58000000e+02 1.46000000e+02 6.75716698e-01 1.
 20000000e+01]
 [4.61000000e+02 2.30000000e+02 7.00757980e-01 1.
 30000000e+01]
 [4.90000000e+02 2.59000000e+02 1.21011011e-01 1.
 40000000e+01]
 [1.33000000e+02 2.79000000e+02 3.63279819e-01 1.
 50000000e+01]
 [4.15000000e+02 8.60000000e+01 9.53229785e-01 1.
 60000000e+01]
 [4.34000000e+02 8.50000000e+01 9.79179740e-01 1.
 70000000e+01]
 [4.04000000e+02 7.30000000e+01 5.80922663e-01 1.
 80000000e+01]
 [4.46000000e+02 7.20000000e+01 7.20671058e-01 1.
 90000000e+01]]

```

```

[[ 0.      1.      2.      3.      4
.      5.
 6.      7.      8.      9.     -1
.     12.
 13.     14.     16.     17.     18
.     19.
 26.9135875 17.    ]]
[array([387., 83.]), array([410., 157.]), array([426
., 218.]), array([469., 71.]), array([459., 148.]),
array([439., 217.])]
Right_elbow: STANDARD

Left_elbow: STANDARD

posed_frame is <class 'numpy.ndarray'>
[[4.24000000e+02 9.20000000e+01 9.69666421e-01 0.
00000000e+00]
 [4.26000000e+02 7.70000000e+01 9.54338968e-01 1.
00000000e+00]
 [3.87000000e+02 8.20000000e+01 9.00981247e-01 2.
00000000e+00]
 [4.10000000e+02 1.57000000e+02 8.77199829e-01 3.
00000000e+00]
 [4.26000000e+02 2.17000000e+02 7.63453662e-01 4.
00000000e+00]
 [4.69000000e+02 7.10000000e+01 9.05924439e-01 5.
00000000e+00]
 [4.59000000e+02 1.48000000e+02 8.32056820e-01 6.
00000000e+00]
 [4.39000000e+02 2.16000000e+02 8.75941515e-01 7.
00000000e+00]
 [4.14000000e+02 1.50000000e+02 5.93047798e-01 8.
00000000e+00]
 [4.22000000e+02 2.29000000e+02 4.02064383e-01 9.
00000000e+00]
 [1.39000000e+02 2.77000000e+02 2.84207463e-01 1.
00000000e+01]
 [4.57000000e+02 1.44000000e+02 6.72181547e-01 1.
10000000e+01]
 [4.61000000e+02 2.29000000e+02 7.05527961e-01 1.
20000000e+01]

```

```

[4.89000000e+02 2.61000000e+02 1.09344207e-01 1.
30000000e+01]
[1.34000000e+02 2.78000000e+02 3.38549256e-01 1.
40000000e+01]
[4.16000000e+02 8.50000000e+01 9.30925667e-01 1.
50000000e+01]
[4.34000000e+02 8.40000000e+01 9.58383143e-01 1.
60000000e+01]
[4.04000000e+02 7.20000000e+01 5.92070878e-01 1.
70000000e+01]
[4.46000000e+02 7.10000000e+01 7.16123343e-01 1.
80000000e+01]]
[[ 0.          1.          2.          3.          4
.          5.
 6.          7.          8.          9.         -1
.         11.
 12.         13.         15.         16.         17
.         18.
 26.75800394 17.          ]]
[array([387., 82.]), array([410., 157.]), array([426
., 217.]), array([469., 71.]), array([459., 148.]),
array([439., 216.])]
Right_elbow: STANDARD

Left_elbow: STANDARD

posed_frame is <class 'numpy.ndarray'>
[[4.26000000e+02 9.00000000e+01 9.72117186e-01 0.
00000000e+00]
 [4.26000000e+02 7.50000000e+01 9.64471698e-01 1.
00000000e+00]
 [3.87000000e+02 8.10000000e+01 8.93609226e-01 2.
00000000e+00]
 [4.10000000e+02 1.56000000e+02 8.79615307e-01 3.
00000000e+00]
 [4.25000000e+02 2.16000000e+02 7.77839541e-01 4.
00000000e+00]
 [4.69000000e+02 7.00000000e+01 9.04450834e-01 5.
00000000e+00]
 [4.60000000e+02 1.45000000e+02 8.42629433e-01 6.
00000000e+00]

```

```

[4.40000000e+02 2.14000000e+02 9.05567169e-01 7.
00000000e+00]
[4.14000000e+02 1.48000000e+02 5.88073850e-01 8.
00000000e+00]
[3.20000000e+02 2.50000000e+02 1.64389253e-01 9.
00000000e+00]
[4.23000000e+02 2.27000000e+02 3.87587339e-01 1.
00000000e+01]
[1.37000000e+02 2.78000000e+02 3.23447913e-01 1.
10000000e+01]
[4.56000000e+02 1.43000000e+02 6.74140096e-01 1.
20000000e+01]
[4.60000000e+02 2.28000000e+02 6.32132530e-01 1.
30000000e+01]
[1.48000000e+02 2.52000000e+02 2.14653894e-01 1.
40000000e+01]
[1.47000000e+02 2.53000000e+02 2.14250624e-01 1.
50000000e+01]
[1.34000000e+02 2.78000000e+02 3.08803767e-01 1.
60000000e+01]
[4.18000000e+02 8.30000000e+01 9.16548610e-01 1.
70000000e+01]
[4.35000000e+02 8.20000000e+01 9.38035309e-01 1.
80000000e+01]
[4.04000000e+02 7.10000000e+01 6.34974480e-01 1.
90000000e+01]
[4.45000000e+02 7.00000000e+01 7.19895959e-01 2.
00000000e+01]]
[[ 0.          1.          2.          3.          4
.          5.
  6.          7.          8.         10.         -1
.         12.
 13.         -1.         17.         18.         19
.         20.
 26.55025717 16.          ]]
[array([387., 81.]), array([410., 156.]), array([425
., 216.]), array([469., 70.]), array([460., 145.]),
array([440., 214.])]
Right_elbow: STANDARD

Left_elbow: STANDARD

```

```

posed_frame is <class 'numpy.ndarray'>
[[4.24000000e+02  8.70000000e+01  1.00073528e+00  0.
 00000000e+00]
 [4.27000000e+02  7.30000000e+01  9.53859210e-01  1.
 00000000e+00]
 [3.87000000e+02  7.70000000e+01  9.07481074e-01  2.
 00000000e+00]
 [4.09000000e+02  1.53000000e+02  9.21255708e-01  3.
 00000000e+00]
 [4.25000000e+02  2.15000000e+02  7.80610502e-01  4.
 00000000e+00]
 [4.69000000e+02  6.80000000e+01  8.98208976e-01  5.
 00000000e+00]
 [4.60000000e+02  1.43000000e+02  8.22481990e-01  6.
 00000000e+00]
 [4.40000000e+02  2.12000000e+02  8.74936283e-01  7.
 00000000e+00]
 [4.14000000e+02  1.48000000e+02  6.07590795e-01  8.
 00000000e+00]
 [3.22000000e+02  2.51000000e+02  1.70279399e-01  9.
 00000000e+00]
 [4.22000000e+02  2.26000000e+02  3.77670646e-01  1.
 00000000e+01]
 [1.37000000e+02  2.78000000e+02  3.40119094e-01  1.
 10000000e+01]
 [4.57000000e+02  1.43000000e+02  6.96743071e-01  1.
 20000000e+01]
 [4.60000000e+02  2.28000000e+02  5.90049326e-01  1.
 30000000e+01]
 [4.72000000e+02  2.16000000e+02  1.10752515e-01  1.
 40000000e+01]
 [1.35000000e+02  2.78000000e+02  3.13588291e-01  1.
 50000000e+01]
 [4.16000000e+02  7.90000000e+01  8.81539047e-01  1.
 60000000e+01]
 [4.32000000e+02  7.80000000e+01  9.18901026e-01  1.
 70000000e+01]
 [4.04000000e+02  6.80000000e+01  5.38078129e-01  1.
 80000000e+01]
 [4.44000000e+02  6.90000000e+01  7.70608723e-01  1.

```

```

900000000e+01]]
[[ 0.          1.          2.          3.          4
.          5.
  6.          7.          8.          10.         -1
.          12.
  13.         -1.          16.          17.          18
.          19.
  26.2674348 16.          ]]
[array([387., 77.]), array([409., 153.]), array([425
., 215.]), array([469., 68.]), array([460., 143.]),
array([440., 212.])]
Right_elbow: STANDARD

Left_elbow: STANDARD

posed_frame is <class 'numpy.ndarray'>
[[4.25000000e+02 8.50000000e+01 1.01620650e+00 0.
00000000e+00]
 [4.27000000e+02 7.00000000e+01 9.49881196e-01 1.
00000000e+00]
 [3.87000000e+02 7.30000000e+01 9.31420028e-01 2.
00000000e+00]
 [4.09000000e+02 1.48000000e+02 8.94019246e-01 3.
00000000e+00]
 [4.25000000e+02 2.12000000e+02 7.57175028e-01 4.
00000000e+00]
 [4.69000000e+02 6.50000000e+01 9.04380560e-01 5.
00000000e+00]
 [4.59000000e+02 1.40000000e+02 8.45499396e-01 6.
00000000e+00]
 [4.39000000e+02 2.10000000e+02 8.87464821e-01 7.
00000000e+00]
 [4.14000000e+02 1.43000000e+02 6.39482200e-01 8.
00000000e+00]
 [3.20000000e+02 2.51000000e+02 2.68887192e-01 9.
00000000e+00]
 [4.21000000e+02 2.24000000e+02 3.97123128e-01 1.
00000000e+01]
 [2.35000000e+02 2.44000000e+02 1.08198322e-01 1.
10000000e+01]
 [1.37000000e+02 2.78000000e+02 3.46892446e-01 1.

```

```

20000000e+01]
[4.57000000e+02 1.39000000e+02 6.98317766e-01 1.
30000000e+01]
[3.20000000e+02 2.48000000e+02 1.81227878e-01 1.
40000000e+01]
[4.61000000e+02 2.27000000e+02 6.28140569e-01 1.
50000000e+01]
[1.51000000e+02 2.48000000e+02 2.31818512e-01 1.
60000000e+01]
[1.50000000e+02 2.49000000e+02 2.31961533e-01 1.
70000000e+01]
[4.91000000e+02 2.57000000e+02 1.14980340e-01 1.
80000000e+01]
[1.35000000e+02 2.79000000e+02 3.09837222e-01 1.
90000000e+01]
[4.16000000e+02 7.50000000e+01 9.54322457e-01 2.
00000000e+01]
[4.33000000e+02 7.50000000e+01 9.61250961e-01 2.
10000000e+01]
[4.05000000e+02 6.50000000e+01 6.54251814e-01 2.
20000000e+01]
[4.45000000e+02 6.40000000e+01 7.11096585e-01 2.
30000000e+01]]
[[ 0.          1.          2.          3.          4
.          5.
 6.          7.          8.         10.         -1
.         13.
 15.         -1.         20.         21.         22
.         23.
 26.71788597 16.          ]]
[array([387., 73.]), array([409., 148.]), array([425
., 212.]), array([469., 65.]), array([459., 140.]),
array([439., 210.])]
Right_elbow: STANDARD

Left_elbow: STANDARD

posed_frame is <class 'numpy.ndarray'>
[[4.26000000e+02 7.60000000e+01 9.42013204e-01 0.
00000000e+00]
[4.27000000e+02 6.30000000e+01 9.39823806e-01 1.

```

```
00000000e+00]
[3.87000000e+02 6.90000000e+01 8.96042824e-01 2.
00000000e+00]
[4.08000000e+02 1.40000000e+02 9.01708066e-01 3.
00000000e+00]
[4.23000000e+02 2.05000000e+02 7.30078697e-01 4.
00000000e+00]
[4.70000000e+02 5.80000000e+01 9.50070560e-01 5.
00000000e+00]
[4.60000000e+02 1.33000000e+02 8.14489365e-01 6.
00000000e+00]
[4.38000000e+02 2.04000000e+02 8.60675514e-01 7.
00000000e+00]
[4.15000000e+02 1.40000000e+02 6.61409318e-01 8.
00000000e+00]
[3.20000000e+02 2.50000000e+02 2.04331607e-01 9.
00000000e+00]
[4.22000000e+02 2.20000000e+02 4.41960573e-01 1.
00000000e+01]
[1.37000000e+02 2.77000000e+02 3.29643458e-01 1.
10000000e+01]
[4.59000000e+02 1.34000000e+02 7.07758069e-01 1.
20000000e+01]
[3.20000000e+02 2.48000000e+02 1.30135715e-01 1.
30000000e+01]
[4.64000000e+02 2.18000000e+02 6.86382830e-01 1.
40000000e+01]
[4.75000000e+02 2.17000000e+02 1.28072336e-01 1.
50000000e+01]
[1.51000000e+02 2.48000000e+02 2.31996238e-01 1.
60000000e+01]
[1.50000000e+02 2.49000000e+02 2.32327908e-01 1.
70000000e+01]
[4.90000000e+02 2.54000000e+02 1.29957139e-01 1.
80000000e+01]
[1.35000000e+02 2.78000000e+02 3.02772850e-01 1.
90000000e+01]
[4.18000000e+02 6.90000000e+01 8.92103672e-01 2.
00000000e+01]
[4.36000000e+02 6.80000000e+01 9.33435440e-01 2.
10000000e+01]
```

```

[4.04000000e+02 5.70000000e+01 6.44694626e-01 2.
20000000e+01]
[4.48000000e+02 5.60000000e+01 6.45926595e-01 2.
30000000e+01]]
[[ 0.          1.          2.          3.          4
.          5.
 6.          7.          8.          10.         -1
.          12.
 14.         18.         20.         21.         22
.          23.
 26.62663657 17.          ]]
[array([387., 69.]), array([408., 140.]), array([423
., 205.]), array([470., 58.]), array([460., 133.]),
array([438., 204.])]
Right_elbow: STANDARD

Left_elbow: STANDARD

posed_frame is <class 'numpy.ndarray'>
[[4.26000000e+02 7.50000000e+01 9.41147745e-01 0.
00000000e+00]
 [4.27000000e+02 6.10000000e+01 9.49851453e-01 1.
00000000e+00]
 [3.87000000e+02 6.70000000e+01 9.02806282e-01 2.
00000000e+00]
 [4.08000000e+02 1.40000000e+02 9.04580712e-01 3.
00000000e+00]
 [4.23000000e+02 2.05000000e+02 7.41149426e-01 4.
00000000e+00]
 [4.70000000e+02 5.70000000e+01 9.43066061e-01 5.
00000000e+00]
 [4.59000000e+02 1.32000000e+02 8.38619888e-01 6.
00000000e+00]
 [4.37000000e+02 2.03000000e+02 8.54542851e-01 7.
00000000e+00]
 [4.14000000e+02 1.40000000e+02 6.61043286e-01 8.
00000000e+00]
 [3.23000000e+02 2.51000000e+02 1.75668791e-01 9.
00000000e+00]
 [4.21000000e+02 2.18000000e+02 4.00879264e-01 1.
00000000e+01]

```

```

[1.37000000e+02 2.78000000e+02 3.37539166e-01 1.
10000000e+01]
[4.59000000e+02 1.32000000e+02 7.02999890e-01 1.
20000000e+01]
[3.22000000e+02 2.49000000e+02 1.11042157e-01 1.
30000000e+01]
[4.65000000e+02 2.17000000e+02 6.84394002e-01 1.
40000000e+01]
[1.52000000e+02 2.48000000e+02 2.33010203e-01 1.
50000000e+01]
[1.51000000e+02 2.49000000e+02 2.33282417e-01 1.
60000000e+01]
[4.90000000e+02 2.54000000e+02 1.20434634e-01 1.
70000000e+01]
[1.36000000e+02 2.78000000e+02 2.94106781e-01 1.
80000000e+01]
[4.18000000e+02 6.80000000e+01 8.68043482e-01 1.
90000000e+01]
[4.35000000e+02 6.70000000e+01 9.25067782e-01 2.
00000000e+01]
[4.04000000e+02 5.60000000e+01 5.58651328e-01 2.
10000000e+01]
[4.46000000e+02 5.40000000e+01 6.92152143e-01 2.
20000000e+01]]
[[ 0.          1.          2.          3.          4
.          5.
 6.          7.          8.         10.         -1
.         12.
 14.         17.         19.         20.         21
.         22.
 26.52857544 17.          ]]
[array([387., 67.]), array([408., 140.]), array([423
., 205.]), array([470., 57.]), array([459., 132.]),
array([437., 203.])]
Right_elbow: STANDARD

Left_elbow: STANDARD

posed_frame is <class 'numpy.ndarray'>
[[4.26000000e+02 7.50000000e+01 9.53968167e-01 0.
00000000e+00]

```

[4.27000000e+02 6.20000000e+01 9.47129607e-01 1.  
00000000e+00]  
[3.87000000e+02 6.70000000e+01 9.04822290e-01 2.  
00000000e+00]  
[4.08000000e+02 1.41000000e+02 9.04263079e-01 3.  
00000000e+00]  
[4.23000000e+02 2.05000000e+02 7.56375253e-01 4.  
00000000e+00]  
[4.70000000e+02 5.70000000e+01 9.47011709e-01 5.  
00000000e+00]  
[4.59000000e+02 1.32000000e+02 8.24612319e-01 6.  
00000000e+00]  
[4.37000000e+02 2.03000000e+02 8.53394747e-01 7.  
00000000e+00]  
[4.14000000e+02 1.39000000e+02 6.46113932e-01 8.  
00000000e+00]  
[3.24000000e+02 2.51000000e+02 2.02092439e-01 9.  
00000000e+00]  
[4.20000000e+02 2.17000000e+02 4.02531236e-01 1.  
00000000e+01]  
[1.37000000e+02 2.78000000e+02 3.64719301e-01 1.  
10000000e+01]  
[4.58000000e+02 1.32000000e+02 7.03586519e-01 1.  
20000000e+01]  
[3.23000000e+02 2.49000000e+02 1.37103185e-01 1.  
30000000e+01]  
[4.63000000e+02 2.17000000e+02 7.05801725e-01 1.  
40000000e+01]  
[1.52000000e+02 2.46000000e+02 2.52077132e-01 1.  
50000000e+01]  
[4.89000000e+02 2.55000000e+02 1.30248606e-01 1.  
60000000e+01]  
[1.35000000e+02 2.78000000e+02 2.95077264e-01 1.  
70000000e+01]  
[4.18000000e+02 6.80000000e+01 8.81499350e-01 1.  
80000000e+01]  
[4.35000000e+02 6.70000000e+01 9.36615586e-01 1.  
90000000e+01]  
[4.04000000e+02 5.60000000e+01 5.78910649e-01 2.  
00000000e+01]  
[4.47000000e+02 5.50000000e+01 6.94641232e-01 2.

```

100000000e+01]]
[[ 0.          1.          2.          3.          4
.          5.
  6.          7.          8.          10.         -1
.          12.
  14.          16.          18.          19.          20
.          21.
  26.66537901 17.          ]]
[array([387., 67.]), array([408., 141.]), array([423
., 205.]), array([470., 57.]), array([459., 132.]),
array([437., 203.])]
Right_elbow: STANDARD

Left_elbow: STANDARD

posed_frame is <class 'numpy.ndarray'>
[[4.26000000e+02 7.70000000e+01 9.55245495e-01 0.
00000000e+00]
 [4.27000000e+02 6.30000000e+01 9.38401401e-01 1.
00000000e+00]
 [3.87000000e+02 6.90000000e+01 9.05801177e-01 2.
00000000e+00]
 [4.08000000e+02 1.41000000e+02 8.99436593e-01 3.
00000000e+00]
 [4.23000000e+02 2.05000000e+02 7.35154569e-01 4.
00000000e+00]
 [4.70000000e+02 5.80000000e+01 9.43916976e-01 5.
00000000e+00]
 [4.60000000e+02 1.33000000e+02 8.12147737e-01 6.
00000000e+00]
 [4.38000000e+02 2.03000000e+02 8.74797404e-01 7.
00000000e+00]
 [4.15000000e+02 1.40000000e+02 6.48557663e-01 8.
00000000e+00]
 [3.24000000e+02 2.50000000e+02 1.74728259e-01 9.
00000000e+00]
 [3.25000000e+02 2.51000000e+02 1.74661279e-01 1.
00000000e+01]
 [4.20000000e+02 2.18000000e+02 4.18156713e-01 1.
10000000e+01]
 [1.38000000e+02 2.78000000e+02 3.36677432e-01 1.

```

```

20000000e+01]
[4.58000000e+02 1.33000000e+02 7.04835892e-01 1.
30000000e+01]
[3.23000000e+02 2.50000000e+02 1.07772402e-01 1.
40000000e+01]
[4.64000000e+02 2.17000000e+02 6.79705739e-01 1.
50000000e+01]
[1.51000000e+02 2.49000000e+02 2.26887465e-01 1.
60000000e+01]
[4.92000000e+02 2.53000000e+02 1.41311988e-01 1.
70000000e+01]
[1.35000000e+02 2.78000000e+02 3.11311662e-01 1.
80000000e+01]
[1.34000000e+02 2.79000000e+02 3.11264694e-01 1.
90000000e+01]
[4.17000000e+02 6.90000000e+01 8.99350524e-01 2.
00000000e+01]
[4.36000000e+02 6.80000000e+01 9.58438873e-01 2.
10000000e+01]
[4.04000000e+02 5.70000000e+01 6.21307850e-01 2.
20000000e+01]
[4.47000000e+02 5.60000000e+01 6.97836876e-01 2.
30000000e+01]]
[[ 0.          1.          2.          3.          4
.          5.
 6.          7.          8.          11.         -1
.          13.
 15.         17.         20.         21.         22
.          23.
 26.66360231 17.          ]]
[array([387., 69.]), array([408., 141.]), array([423
., 205.]), array([470., 58.]), array([460., 133.]),
array([438., 203.])]
Right_elbow: STANDARD

Left_elbow: STANDARD

posed_frame is <class 'numpy.ndarray'>
[[4.29000000e+02 8.70000000e+01 9.39004362e-01 0.
00000000e+00]
[4.27000000e+02 7.00000000e+01 9.68816698e-01 1.

```

```

00000000e+00]
[3.88000000e+02 7.30000000e+01 9.30826247e-01 2.
00000000e+00]
[4.08000000e+02 1.45000000e+02 8.98049474e-01 3.
00000000e+00]
[4.25000000e+02 2.11000000e+02 7.54358768e-01 4.
00000000e+00]
[4.70000000e+02 6.40000000e+01 9.06102359e-01 5.
00000000e+00]
[4.60000000e+02 1.41000000e+02 8.43273520e-01 6.
00000000e+00]
[4.39000000e+02 2.07000000e+02 8.78722787e-01 7.
00000000e+00]
[4.14000000e+02 1.43000000e+02 6.29361749e-01 8.
00000000e+00]
[3.23000000e+02 2.52000000e+02 2.22404957e-01 9.
00000000e+00]
[4.21000000e+02 2.26000000e+02 4.18761194e-01 1.
00000000e+01]
[1.38000000e+02 2.78000000e+02 3.40522736e-01 1.
10000000e+01]
[4.58000000e+02 1.39000000e+02 6.79078400e-01 1.
20000000e+01]
[3.21000000e+02 2.50000000e+02 1.36084333e-01 1.
30000000e+01]
[4.61000000e+02 2.27000000e+02 6.32261753e-01 1.
40000000e+01]
[4.91000000e+02 2.57000000e+02 1.30130544e-01 1.
50000000e+01]
[1.34000000e+02 2.79000000e+02 3.23431373e-01 1.
60000000e+01]
[4.21000000e+02 7.80000000e+01 8.57773006e-01 1.
70000000e+01]
[4.36000000e+02 7.70000000e+01 8.85050774e-01 1.
80000000e+01]
[4.07000000e+02 6.80000000e+01 7.04333067e-01 1.
90000000e+01]
[4.45000000e+02 6.70000000e+01 6.19252324e-01 2.
00000000e+01]]
[[ 0.          1.          2.          3.          4
.          5.

```

```

        6.          7.          8.          10.          -1
.          12.
    14.          15.          17.          18.          19
.          20.
    26.37018721 17.          ]]
[array([388., 73.]), array([408., 145.]), array([425
., 211.]), array([470., 64.]), array([460., 141.]),
array([439., 207.])]
Right_elbow: STANDARD

Left_elbow: STANDARD

posed_frame is <class 'numpy.ndarray'>
[[4.28000000e+02 9.00000000e+01 9.36621606e-01 0.
00000000e+00]
 [4.27000000e+02 7.30000000e+01 9.78873849e-01 1.
00000000e+00]
 [3.87000000e+02 7.70000000e+01 9.01292562e-01 2.
00000000e+00]
 [4.09000000e+02 1.52000000e+02 9.44334567e-01 3.
00000000e+00]
 [4.24000000e+02 2.14000000e+02 7.97087014e-01 4.
00000000e+00]
 [4.69000000e+02 6.80000000e+01 8.86641383e-01 5.
00000000e+00]
 [4.59000000e+02 1.43000000e+02 8.60381007e-01 6.
00000000e+00]
 [4.40000000e+02 2.11000000e+02 8.59928489e-01 7.
00000000e+00]
 [4.13000000e+02 1.41000000e+02 5.72071791e-01 8.
00000000e+00]
 [3.26000000e+02 2.51000000e+02 1.66709378e-01 9.
00000000e+00]
 [4.21000000e+02 2.23000000e+02 3.20109308e-01 1.
00000000e+01]
 [1.39000000e+02 2.77000000e+02 3.18381846e-01 1.
10000000e+01]
 [4.57000000e+02 1.37000000e+02 6.49756908e-01 1.
20000000e+01]
 [4.62000000e+02 2.27000000e+02 5.87710559e-01 1.
30000000e+01]

```

```

[4.91000000e+02 2.58000000e+02 1.12333789e-01 1.
40000000e+01]
[1.34000000e+02 2.79000000e+02 3.52176666e-01 1.
50000000e+01]
[4.20000000e+02 8.30000000e+01 9.13771451e-01 1.
60000000e+01]
[4.36000000e+02 8.20000000e+01 9.17911530e-01 1.
70000000e+01]
[4.06000000e+02 7.30000000e+01 6.49382293e-01 1.
80000000e+01]
[4.46000000e+02 6.90000000e+01 7.23593533e-01 1.
90000000e+01]]
[[ 0.          1.          2.          3.          4
.          5.
 6.          7.          8.          10.         -1
.         12.
 13.         -1.         16.          17.         18
.         19.
 26.20033763 16.          ]]
[array([387., 77.]), array([409., 152.]), array([424
., 214.]), array([469., 68.]), array([459., 143.]),
array([440., 211.])]
Right_elbow: STANDARD

Left_elbow: STANDARD

posed_frame is <class 'numpy.ndarray'>
[[4.29000000e+02 9.80000000e+01 9.26442146e-01 0.
00000000e+00]
 [4.27000000e+02 7.80000000e+01 9.49352264e-01 1.
00000000e+00]
 [3.88000000e+02 8.30000000e+01 9.03139412e-01 2.
00000000e+00]
 [4.09000000e+02 1.57000000e+02 8.85426223e-01 3.
00000000e+00]
 [4.26000000e+02 2.17000000e+02 7.71649122e-01 4.
00000000e+00]
 [4.69000000e+02 7.10000000e+01 9.13442373e-01 5.
00000000e+00]
 [4.59000000e+02 1.47000000e+02 8.69319797e-01 6.
00000000e+00]

```

```

[4.39000000e+02 2.15000000e+02 8.64082098e-01 7.
00000000e+00]
[4.14000000e+02 1.46000000e+02 5.77850401e-01 8.
00000000e+00]
[3.26000000e+02 2.50000000e+02 1.11563876e-01 9.
00000000e+00]
[4.22000000e+02 2.27000000e+02 3.79342824e-01 1.
00000000e+01]
[1.39000000e+02 2.77000000e+02 3.04636687e-01 1.
10000000e+01]
[4.58000000e+02 1.41000000e+02 6.54200017e-01 1.
20000000e+01]
[4.61000000e+02 2.28000000e+02 6.78593934e-01 1.
30000000e+01]
[4.91000000e+02 2.55000000e+02 1.33789182e-01 1.
40000000e+01]
[1.34000000e+02 2.79000000e+02 3.57849270e-01 1.
50000000e+01]
[4.20000000e+02 8.90000000e+01 9.43329513e-01 1.
60000000e+01]
[4.36000000e+02 8.90000000e+01 9.52541351e-01 1.
70000000e+01]
[4.06000000e+02 7.90000000e+01 6.58633769e-01 1.
80000000e+01]
[4.47000000e+02 7.50000000e+01 6.33531570e-01 1.
90000000e+01]]
[[ 0.          1.          2.          3.          4
.          5.
 6.          7.          8.          10.         -1
.          12.
 13.         14.         16.         17.         18
.          19.
 26.67597882 17.          ]]
[array([388., 83.]), array([409., 157.]), array([426
., 217.]), array([469., 71.]), array([459., 147.]),
array([439., 215.])]
Right_elbow: STANDARD

Left_elbow: STANDARD

posed_frame is <class 'numpy.ndarray'>

```

```

[[4.28000000e+02 9.90000000e+01 9.30445075e-01 0.
00000000e+00]
 [4.26000000e+02 8.00000000e+01 9.64113891e-01 1.
00000000e+00]
 [3.88000000e+02 8.40000000e+01 9.21061933e-01 2.
00000000e+00]
 [4.10000000e+02 1.61000000e+02 8.74654055e-01 3.
00000000e+00]
 [4.26000000e+02 2.19000000e+02 7.46237814e-01 4.
00000000e+00]
 [4.69000000e+02 7.30000000e+01 9.20992672e-01 5.
00000000e+00]
 [4.59000000e+02 1.49000000e+02 8.63179803e-01 6.
00000000e+00]
 [4.39000000e+02 2.17000000e+02 8.73314023e-01 7.
00000000e+00]
 [4.13000000e+02 1.46000000e+02 5.82745492e-01 8.
00000000e+00]
 [4.22000000e+02 2.27000000e+02 3.55030239e-01 9.
00000000e+00]
 [1.38000000e+02 2.77000000e+02 3.06205034e-01 1.
00000000e+01]
 [4.57000000e+02 1.42000000e+02 6.43274248e-01 1.
10000000e+01]
 [4.59000000e+02 2.27000000e+02 6.85719609e-01 1.
20000000e+01]
 [4.90000000e+02 2.56000000e+02 1.16085522e-01 1.
30000000e+01]
 [1.34000000e+02 2.78000000e+02 3.26305866e-01 1.
40000000e+01]
 [4.19000000e+02 9.00000000e+01 9.03409481e-01 1.
50000000e+01]
 [4.35000000e+02 8.90000000e+01 9.39278722e-01 1.
60000000e+01]
 [4.06000000e+02 8.10000000e+01 6.48925185e-01 1.
70000000e+01]
 [4.46000000e+02 7.70000000e+01 6.55656338e-01 1.
80000000e+01]]
[[ 0.          1.          2.          3.          4
.          5.
 6.          7.          8.          9.         -1

```

```

.          11.
12.          13.          15.          16.          17
.          18.
26.36819808 17.          ]]
[array([388., 84.]), array([410., 161.]), array([426
., 219.]), array([469., 73.]), array([459., 149.]),
array([439., 217.])]
Right_elbow: STANDARD

Left_elbow: STANDARD

posed_frame is <class 'numpy.ndarray'>
[[4.28000000e+02 9.90000000e+01 9.43750143e-01 0.
00000000e+00]
 [4.27000000e+02 8.00000000e+01 9.59980011e-01 1.
00000000e+00]
 [3.87000000e+02 8.40000000e+01 9.17024612e-01 2.
00000000e+00]
 [4.11000000e+02 1.62000000e+02 8.40838134e-01 3.
00000000e+00]
 [4.26000000e+02 2.19000000e+02 7.52255678e-01 4.
00000000e+00]
 [4.69000000e+02 7.20000000e+01 9.24338698e-01 5.
00000000e+00]
 [4.60000000e+02 1.47000000e+02 8.37889671e-01 6.
00000000e+00]
 [4.40000000e+02 2.15000000e+02 8.68275821e-01 7.
00000000e+00]
 [4.14000000e+02 1.44000000e+02 6.08587742e-01 8.
00000000e+00]
 [3.20000000e+02 2.53000000e+02 2.44575933e-01 9.
00000000e+00]
 [4.22000000e+02 2.27000000e+02 3.43787253e-01 1.
00000000e+01]
 [2.34000000e+02 2.45000000e+02 1.06292836e-01 1.
10000000e+01]
 [1.36000000e+02 2.78000000e+02 3.53995740e-01 1.
20000000e+01]
 [4.58000000e+02 1.41000000e+02 6.72103643e-01 1.
30000000e+01]
 [3.19000000e+02 2.49000000e+02 1.42747611e-01 1.

```

```

400000000e+01]
[4.62000000e+02 2.27000000e+02 6.49420857e-01 1.
500000000e+01]
[1.51000000e+02 2.48000000e+02 2.30294257e-01 1.
600000000e+01]
[4.89000000e+02 2.55000000e+02 1.03698976e-01 1.
700000000e+01]
[1.34000000e+02 2.79000000e+02 2.99712598e-01 1.
800000000e+01]
[4.19000000e+02 9.00000000e+01 9.35419440e-01 1.
900000000e+01]
[4.35000000e+02 8.90000000e+01 9.52691078e-01 2.
000000000e+01]
[4.06000000e+02 8.00000000e+01 6.17221653e-01 2.
100000000e+01]
[4.46000000e+02 7.70000000e+01 6.69495642e-01 2.
200000000e+01]]
[[ 0.          1.          2.          3.          4
.          5.
 6.          7.          8.          10.         -1
.          13.
 15.         17.         19.         20.         21
.          22.
 26.5357142 17.        ]]
[array([387., 84.]), array([411., 162.]), array([426
., 219.]), array([469., 72.]), array([460., 147.]),
array([440., 215.])]
Right_elbow: STANDARD

Left_elbow: STANDARD

posed_frame is <class 'numpy.ndarray'>
[[4.25000000e+02 9.30000000e+01 9.59812045e-01 0.
00000000e+00]
[4.26000000e+02 7.60000000e+01 9.61221874e-01 1.
00000000e+00]
[3.87000000e+02 8.00000000e+01 8.99479508e-01 2.
00000000e+00]
[4.10000000e+02 1.56000000e+02 8.83262992e-01 3.
00000000e+00]
[4.24000000e+02 2.17000000e+02 7.46107697e-01 4.

```

```

00000000e+00]
[4.69000000e+02 7.10000000e+01 9.04767036e-01 5.
00000000e+00]
[4.60000000e+02 1.47000000e+02 8.31371069e-01 6.
00000000e+00]
[4.39000000e+02 2.14000000e+02 9.23657596e-01 7.
00000000e+00]
[4.13000000e+02 1.46000000e+02 5.88316977e-01 8.
00000000e+00]
[3.22000000e+02 2.50000000e+02 1.28806174e-01 9.
00000000e+00]
[4.22000000e+02 2.25000000e+02 3.52440774e-01 1.
00000000e+01]
[1.37000000e+02 2.78000000e+02 3.48666489e-01 1.
10000000e+01]
[4.56000000e+02 1.41000000e+02 6.74477816e-01 1.
20000000e+01]
[4.60000000e+02 2.26000000e+02 6.18435621e-01 1.
30000000e+01]
[1.35000000e+02 2.78000000e+02 3.11637104e-01 1.
40000000e+01]
[4.16000000e+02 8.50000000e+01 9.35842633e-01 1.
50000000e+01]
[4.34000000e+02 8.50000000e+01 9.39332426e-01 1.
60000000e+01]
[4.04000000e+02 7.40000000e+01 6.10497236e-01 1.
70000000e+01]
[4.45000000e+02 7.20000000e+01 7.53897607e-01 1.
80000000e+01]]
[[ 0.          1.          2.          3.          4
.          5.
 6.          7.          8.          10.         -1
.          12.
 13.         -1.          15.          16.          17
.          18.
 26.34690149 16.          ]]
[array([387., 80.]), array([410., 156.]), array([424
., 217.]), array([469., 71.]), array([460., 147.]),
array([439., 214.])]
Right_elbow: STANDARD

```

Left\_elbow: STANDARD

```

posed_frame is <class 'numpy.ndarray'>
[[4.25000000e+02  8.80000000e+01  9.62041557e-01  0.
 00000000e+00]
 [4.27000000e+02  7.20000000e+01  9.71314609e-01  1.
 00000000e+00]
 [3.88000000e+02  7.50000000e+01  9.13365126e-01  2.
 00000000e+00]
 [4.10000000e+02  1.54000000e+02  8.82355988e-01  3.
 00000000e+00]
 [4.24000000e+02  2.14000000e+02  7.75236070e-01  4.
 00000000e+00]
 [4.69000000e+02  6.70000000e+01  8.94930422e-01  5.
 00000000e+00]
 [4.61000000e+02  1.42000000e+02  8.28508019e-01  6.
 00000000e+00]
 [4.40000000e+02  2.09000000e+02  8.66881251e-01  7.
 00000000e+00]
 [4.13000000e+02  1.41000000e+02  6.07324004e-01  8.
 00000000e+00]
 [3.20000000e+02  2.51000000e+02  2.94009566e-01  9.
 00000000e+00]
 [4.20000000e+02  2.25000000e+02  3.54018539e-01  1.
 00000000e+01]
 [2.33000000e+02  2.46000000e+02  1.38614953e-01  1.
 10000000e+01]
 [1.37000000e+02  2.78000000e+02  3.61378700e-01  1.
 20000000e+01]
 [4.57000000e+02  1.37000000e+02  6.81063235e-01  1.
 30000000e+01]
 [3.19000000e+02  2.48000000e+02  1.90266043e-01  1.
 40000000e+01]
 [4.61000000e+02  2.27000000e+02  6.45935297e-01  1.
 50000000e+01]
 [1.51000000e+02  2.45000000e+02  2.55277425e-01  1.
 60000000e+01]
 [4.89000000e+02  2.59000000e+02  1.18402787e-01  1.
 70000000e+01]
 [1.35000000e+02  2.79000000e+02  2.90816784e-01  1.
 80000000e+01]

```

```

[4.18000000e+02 8.10000000e+01 8.76220524e-01 1.
90000000e+01]
[4.34000000e+02 8.00000000e+01 8.92156065e-01 2.
00000000e+01]
[4.05000000e+02 7.00000000e+01 6.08650267e-01 2.
10000000e+01]
[4.44000000e+02 6.90000000e+01 7.66808152e-01 2.
20000000e+01]]
[[ 0.          1.          2.          3.          4
.          5.
 6.          7.          8.          10.         -1
.          13.
 15.         -1.          19.          20.          21
.          22.
 26.10152871 16.          ]]
[array([388., 75.]), array([410., 154.]), array([424
., 214.]), array([469., 67.]), array([461., 142.]),
array([440., 209.])]
Right_elbow: STANDARD

Left_elbow: STANDARD

posed_frame is <class 'numpy.ndarray'>
[[4.25000000e+02 8.50000000e+01 9.65229154e-01 0.
00000000e+00]
[4.27000000e+02 6.80000000e+01 9.49469507e-01 1.
00000000e+00]
[3.89000000e+02 7.20000000e+01 9.46837366e-01 2.
00000000e+00]
[4.09000000e+02 1.46000000e+02 9.10820901e-01 3.
00000000e+00]
[4.24000000e+02 2.11000000e+02 7.70171165e-01 4.
00000000e+00]
[4.70000000e+02 6.30000000e+01 9.13459778e-01 5.
00000000e+00]
[4.60000000e+02 1.39000000e+02 8.32004309e-01 6.
00000000e+00]
[4.39000000e+02 2.06000000e+02 8.45489979e-01 7.
00000000e+00]
[4.15000000e+02 1.41000000e+02 6.48394346e-01 8.
00000000e+00]

```

```

[3.19000000e+02 2.51000000e+02 2.67278939e-01 9.
00000000e+00]
[4.21000000e+02 2.25000000e+02 3.94689023e-01 1.
00000000e+01]
[2.35000000e+02 2.44000000e+02 1.05062693e-01 1.
10000000e+01]
[2.34000000e+02 2.45000000e+02 1.04933284e-01 1.
20000000e+01]
[1.51000000e+02 2.55000000e+02 2.68864781e-01 1.
30000000e+01]
[1.50000000e+02 2.56000000e+02 2.68505603e-01 1.
40000000e+01]
[1.49000000e+02 2.57000000e+02 2.67875075e-01 1.
50000000e+01]
[1.36000000e+02 2.77000000e+02 3.35533321e-01 1.
60000000e+01]
[4.59000000e+02 1.37000000e+02 7.17414618e-01 1.
70000000e+01]
[3.19000000e+02 2.48000000e+02 1.87971711e-01 1.
80000000e+01]
[4.61000000e+02 2.28000000e+02 6.65250838e-01 1.
90000000e+01]
[1.52000000e+02 2.47000000e+02 2.42776930e-01 2.
00000000e+01]
[4.92000000e+02 2.55000000e+02 1.17822476e-01 2.
10000000e+01]
[1.34000000e+02 2.78000000e+02 2.83232808e-01 2.
20000000e+01]
[4.17000000e+02 7.60000000e+01 8.59567940e-01 2.
30000000e+01]
[4.32000000e+02 7.40000000e+01 8.93218637e-01 2.
40000000e+01]
[4.05000000e+02 6.70000000e+01 5.11449695e-01 2.
50000000e+01]
[4.44000000e+02 6.40000000e+01 7.60865986e-01 2.
60000000e+01]]
[[ 0.          1.          2.          3.          4
.          5.
 6.          7.          8.          10.         -1
.          17.
 19.         21.         23.         24.         25

```

```

.      26.
  26.08921186 17.      ]]
[array([389., 72.]), array([409., 146.]), array([424
., 211.]), array([470., 63.]), array([460., 139.]),
array([439., 206.])]
Right_elbow: STANDARD

Left_elbow: STANDARD

posed_frame is <class 'numpy.ndarray'>
[[4.26000000e+02 7.60000000e+01 9.37239945e-01 0.
00000000e+00]
 [4.28000000e+02 6.10000000e+01 9.53221202e-01 1.
00000000e+00]
 [3.89000000e+02 6.70000000e+01 8.87642324e-01 2.
00000000e+00]
 [4.08000000e+02 1.38000000e+02 9.10343885e-01 3.
00000000e+00]
 [4.24000000e+02 2.04000000e+02 7.59753346e-01 4.
00000000e+00]
 [4.70000000e+02 5.70000000e+01 9.53366280e-01 5.
00000000e+00]
 [4.61000000e+02 1.30000000e+02 8.13470960e-01 6.
00000000e+00]
 [4.38000000e+02 2.02000000e+02 8.06806386e-01 7.
00000000e+00]
 [4.14000000e+02 1.39000000e+02 6.76269054e-01 8.
00000000e+00]
 [3.23000000e+02 2.51000000e+02 1.61304891e-01 9.
00000000e+00]
 [4.21000000e+02 2.20000000e+02 4.12885129e-01 1.
00000000e+01]
 [1.51000000e+02 2.55000000e+02 2.64879316e-01 1.
10000000e+01]
 [1.50000000e+02 2.56000000e+02 2.64456451e-01 1.
20000000e+01]
 [1.49000000e+02 2.57000000e+02 2.63714790e-01 1.
30000000e+01]
 [1.48000000e+02 2.59000000e+02 2.62526363e-01 1.
40000000e+01]
 [1.37000000e+02 2.77000000e+02 3.07736069e-01 1.

```

```

500000000e+01]
[4.590000000e+02 1.330000000e+02 7.32911229e-01 1.
600000000e+01]
[4.650000000e+02 2.160000000e+02 7.05295503e-01 1.
700000000e+01]
[1.510000000e+02 2.490000000e+02 2.35694781e-01 1.
800000000e+01]
[4.910000000e+02 2.570000000e+02 1.61352694e-01 1.
900000000e+01]
[1.350000000e+02 2.780000000e+02 3.00448418e-01 2.
000000000e+01]
[4.180000000e+02 6.800000000e+01 8.81251812e-01 2.
100000000e+01]
[4.350000000e+02 6.800000000e+01 8.99538517e-01 2.
200000000e+01]
[4.050000000e+02 5.500000000e+01 6.80544019e-01 2.
300000000e+01]
[4.470000000e+02 5.500000000e+01 6.83968544e-01 2.
400000000e+01]]
[[ 0.          1.          2.          3.          4
.          5.
 6.          7.          8.          10.         -1
.          16.
 17.         19.         21.         22.         23
.          24.
 26.74778468 17.          ]]
[array([389., 67.]), array([408., 138.]), array([424
., 204.]), array([470., 57.]), array([461., 130.]),
array([438., 202.])]
Right_elbow: STANDARD

Left_elbow: STANDARD

posed_frame is <class 'numpy.ndarray'>
[[4.240000000e+02 7.600000000e+01 9.74312305e-01 0.
000000000e+00]
[4.290000000e+02 6.100000000e+01 9.41987216e-01 1.
000000000e+00]
[3.890000000e+02 6.600000000e+01 8.94692481e-01 2.
000000000e+00]
[4.080000000e+02 1.370000000e+02 9.25750554e-01 3.

```

```

00000000e+00]
[4.23000000e+02 2.03000000e+02 7.45399058e-01 4.
00000000e+00]
[4.70000000e+02 5.70000000e+01 9.43010211e-01 5.
00000000e+00]
[4.61000000e+02 1.29000000e+02 8.28547478e-01 6.
00000000e+00]
[4.37000000e+02 2.02000000e+02 8.35597754e-01 7.
00000000e+00]
[4.15000000e+02 1.37000000e+02 6.78192914e-01 8.
00000000e+00]
[3.24000000e+02 2.50000000e+02 1.26757413e-01 9.
00000000e+00]
[4.21000000e+02 2.18000000e+02 4.11829501e-01 1.
00000000e+01]
[1.39000000e+02 2.76000000e+02 3.01838249e-01 1.
10000000e+01]
[4.59000000e+02 1.31000000e+02 7.32211709e-01 1.
20000000e+01]
[4.66000000e+02 2.17000000e+02 7.07485795e-01 1.
30000000e+01]
[4.94000000e+02 2.55000000e+02 1.91509694e-01 1.
40000000e+01]
[1.36000000e+02 2.78000000e+02 2.95823783e-01 1.
50000000e+01]
[4.16000000e+02 6.80000000e+01 8.80605519e-01 1.
60000000e+01]
[4.34000000e+02 6.80000000e+01 9.14547861e-01 1.
70000000e+01]
[4.04000000e+02 5.60000000e+01 5.48710763e-01 1.
80000000e+01]
[4.47000000e+02 5.50000000e+01 7.38494158e-01 1.
90000000e+01]]
[[ 0.          1.          2.          3.          4
.          5.
 6.          7.          8.         10.         -1
.         12.
 13.         14.         16.         17.         18
.         19.
 27.03130299 17.          ]]
[array([389., 66.]), array([408., 137.]), array([423

```

```

., 203.]), array([470., 57.]), array([461., 129.]),
array([437., 202.]))
Right_elbow: STANDARD

Left_elbow: STANDARD

posed_frame is <class 'numpy.ndarray'>
[[4.25000000e+02 7.60000000e+01 9.55487669e-01 0.
00000000e+00]
 [4.29000000e+02 6.10000000e+01 9.47625279e-01 1.
00000000e+00]
 [3.89000000e+02 6.60000000e+01 8.96318555e-01 2.
00000000e+00]
 [4.08000000e+02 1.38000000e+02 9.27280664e-01 3.
00000000e+00]
 [4.23000000e+02 2.04000000e+02 7.58284926e-01 4.
00000000e+00]
 [4.71000000e+02 5.70000000e+01 9.45175648e-01 5.
00000000e+00]
 [4.61000000e+02 1.29000000e+02 8.17714930e-01 6.
00000000e+00]
 [4.37000000e+02 2.01000000e+02 8.25705469e-01 7.
00000000e+00]
 [4.14000000e+02 1.38000000e+02 6.78526461e-01 8.
00000000e+00]
 [3.22000000e+02 2.50000000e+02 1.81993350e-01 9.
00000000e+00]
 [4.21000000e+02 2.19000000e+02 4.04473782e-01 1.
00000000e+01]
 [1.38000000e+02 2.78000000e+02 3.42284381e-01 1.
10000000e+01]
 [4.59000000e+02 1.32000000e+02 7.33325601e-01 1.
20000000e+01]
 [3.22000000e+02 2.48000000e+02 1.04807638e-01 1.
30000000e+01]
 [4.66000000e+02 2.17000000e+02 7.03033090e-01 1.
40000000e+01]
 [4.94000000e+02 2.56000000e+02 1.88833788e-01 1.
50000000e+01]
 [1.35000000e+02 2.78000000e+02 2.96864629e-01 1.
60000000e+01]

```

```

[4.18000000e+02 6.80000000e+01 8.79284561e-01 1.
70000000e+01]
[4.35000000e+02 6.80000000e+01 9.10666347e-01 1.
80000000e+01]
[4.05000000e+02 5.50000000e+01 6.15307808e-01 1.
90000000e+01]
[4.47000000e+02 5.60000000e+01 7.09267020e-01 2.
00000000e+01]]
[[ 0.          1.          2.          3.          4
.          5.
 6.          7.          8.          10.         -1
.          12.
 14.         15.         17.         18.         19
.          20.
 26.87805652 17.          ]]
[array([389., 66.]), array([408., 138.]), array([423
., 204.]), array([471., 57.]), array([461., 129.]),
array([437., 201.])]
Right_elbow: STANDARD

Left_elbow: STANDARD

posed_frame is <class 'numpy.ndarray'>
[[4.25000000e+02 8.10000000e+01 9.75263178e-01 0.
00000000e+00]
[4.29000000e+02 6.30000000e+01 9.26853657e-01 1.
00000000e+00]
[3.89000000e+02 6.80000000e+01 9.14166033e-01 2.
00000000e+00]
[4.09000000e+02 1.40000000e+02 9.11214173e-01 3.
00000000e+00]
[4.24000000e+02 2.05000000e+02 7.68346786e-01 4.
00000000e+00]
[4.71000000e+02 5.80000000e+01 9.44388628e-01 5.
00000000e+00]
[4.60000000e+02 1.32000000e+02 8.08393538e-01 6.
00000000e+00]
[4.38000000e+02 2.03000000e+02 8.02176416e-01 7.
00000000e+00]
[4.14000000e+02 1.36000000e+02 6.44617260e-01 8.
00000000e+00]

```

```

[3.20000000e+02 2.50000000e+02 2.18826130e-01 9.
00000000e+00]
[4.21000000e+02 2.20000000e+02 4.53477949e-01 1.
00000000e+01]
[1.53000000e+02 2.52000000e+02 2.76677310e-01 1.
10000000e+01]
[1.38000000e+02 2.77000000e+02 2.81562269e-01 1.
20000000e+01]
[4.59000000e+02 1.31000000e+02 7.29234695e-01 1.
30000000e+01]
[3.20000000e+02 2.47000000e+02 1.38567865e-01 1.
40000000e+01]
[4.64000000e+02 2.16000000e+02 7.51926839e-01 1.
50000000e+01]
[1.51000000e+02 2.48000000e+02 2.35616997e-01 1.
60000000e+01]
[4.91000000e+02 2.57000000e+02 2.16298252e-01 1.
70000000e+01]
[1.33000000e+02 2.79000000e+02 3.26444715e-01 1.
80000000e+01]
[4.17000000e+02 7.20000000e+01 9.30381238e-01 1.
90000000e+01]
[4.34000000e+02 7.10000000e+01 9.67781961e-01 2.
00000000e+01]
[4.04000000e+02 5.90000000e+01 6.15732193e-01 2.
10000000e+01]
[4.47000000e+02 5.90000000e+01 7.06035316e-01 2.
20000000e+01]]
[[ 0.          1.          2.          3.          4
.          5.
 6.          7.          8.         10.         -1
.         13.
 15.         17.         19.         20.         21
.         22.
 27.17203415 17.          ]]
[array([389., 68.]), array([409., 140.]), array([424
., 205.]), array([471., 58.]), array([460., 132.]),
array([438., 203.])]
Right_elbow: STANDARD

Left_elbow: STANDARD

```

```
posed_frame is <class 'numpy.ndarray'>
[[4.26000000e+02  8.90000000e+01  9.79290605e-01  0.
 00000000e+00]
 [4.29000000e+02  7.10000000e+01  9.67648625e-01  1.
 00000000e+00]
 [3.89000000e+02  7.30000000e+01  9.64922071e-01  2.
 00000000e+00]
 [4.10000000e+02  1.48000000e+02  8.76325667e-01  3.
 00000000e+00]
 [4.24000000e+02  2.11000000e+02  7.47434795e-01  4.
 00000000e+00]
 [4.70000000e+02  6.70000000e+01  9.08254266e-01  5.
 00000000e+00]
 [4.62000000e+02  1.39000000e+02  8.41890454e-01  6.
 00000000e+00]
 [4.39000000e+02  2.08000000e+02  8.58085632e-01  7.
 00000000e+00]
 [4.14000000e+02  1.38000000e+02  6.16961181e-01  8.
 00000000e+00]
 [3.22000000e+02  2.51000000e+02  1.89091042e-01  9.
 00000000e+00]
 [4.20000000e+02  2.22000000e+02  4.30443406e-01  1.
 00000000e+01]
 [1.53000000e+02  2.52000000e+02  2.85496265e-01  1.
 10000000e+01]
 [4.52000000e+02  2.68000000e+02  1.05698556e-01  1.
 20000000e+01]
 [1.38000000e+02  2.77000000e+02  2.98584968e-01  1.
 30000000e+01]
 [4.57000000e+02  1.34000000e+02  6.59943223e-01  1.
 40000000e+01]
 [3.21000000e+02  2.49000000e+02  1.05453260e-01  1.
 50000000e+01]
 [4.60000000e+02  2.20000000e+02  6.85085535e-01  1.
 60000000e+01]
 [1.51000000e+02  2.48000000e+02  2.39515051e-01  1.
 70000000e+01]
 [1.50000000e+02  2.49000000e+02  2.39815205e-01  1.
 80000000e+01]
 [4.88000000e+02  2.64000000e+02  1.75334305e-01  1.
```

```

900000000e+01]
[1.330000000e+02 2.790000000e+02 3.18033367e-01 2.
000000000e+01]
[4.190000000e+02 8.200000000e+01 8.72481525e-01 2.
100000000e+01]
[4.350000000e+02 8.100000000e+01 9.14821386e-01 2.
200000000e+01]
[4.060000000e+02 7.300000000e+01 5.33981681e-01 2.
300000000e+01]
[4.450000000e+02 7.000000000e+01 7.76492119e-01 2.
400000000e+01]]
[[ 0.          1.          2.          3.          4
.          5.
  6.          7.          8.          10.         12
.          14.
 16.          19.          21.          22.         23
.          24.
 26.80645999 18.          ]]
[array([389., 73.]), array([410., 148.]), array([424
., 211.]), array([470., 67.]), array([462., 139.]),
array([439., 208.])]
Right_elbow: STANDARD

Left_elbow: NOT STANDARD

posed_frame is <class 'numpy.ndarray'>
[[4.260000000e+02 1.000000000e+02 9.21132445e-01 0.
000000000e+00]
[4.290000000e+02 7.700000000e+01 9.67968464e-01 1.
000000000e+00]
[3.900000000e+02 8.000000000e+01 9.48985875e-01 2.
000000000e+00]
[4.100000000e+02 1.550000000e+02 9.05331075e-01 3.
000000000e+00]
[4.250000000e+02 2.160000000e+02 7.54221737e-01 4.
000000000e+00]
[4.700000000e+02 7.100000000e+01 9.02506471e-01 5.
000000000e+00]
[4.620000000e+02 1.440000000e+02 8.43045115e-01 6.
000000000e+00]
[4.390000000e+02 2.130000000e+02 8.90806377e-01 7.

```

```

00000000e+00]
[4.16000000e+02 1.38000000e+02 5.64817846e-01 8.
00000000e+00]
[3.19000000e+02 2.52000000e+02 2.10080698e-01 9.
00000000e+00]
[4.22000000e+02 2.24000000e+02 3.78812253e-01 1.
00000000e+01]
[1.53000000e+02 2.52000000e+02 2.85025477e-01 1.
10000000e+01]
[1.38000000e+02 2.77000000e+02 3.05390388e-01 1.
20000000e+01]
[4.59000000e+02 1.35000000e+02 6.24371409e-01 1.
30000000e+01]
[3.19000000e+02 2.46000000e+02 1.20187894e-01 1.
40000000e+01]
[4.61000000e+02 2.25000000e+02 6.43709421e-01 1.
50000000e+01]
[1.51000000e+02 2.48000000e+02 2.38773718e-01 1.
60000000e+01]
[4.94000000e+02 2.55000000e+02 1.79166541e-01 1.
70000000e+01]
[1.33000000e+02 2.79000000e+02 3.16045761e-01 1.
80000000e+01]
[4.19000000e+02 9.20000000e+01 7.91458666e-01 1.
90000000e+01]
[4.33000000e+02 9.20000000e+01 8.48728955e-01 2.
00000000e+01]
[4.07000000e+02 8.10000000e+01 5.34331620e-01 2.
10000000e+01]
[4.44000000e+02 8.30000000e+01 7.80373871e-01 2.
20000000e+01]]
[[ 0.          1.          2.          3.          4
.          5.
 6.          7.          8.         10.         -1
.         13.
 15.         17.         19.         20.         21
.         22.
 25.70932541 17.          ]]
[array([390., 80.]), array([410., 155.]), array([425
., 216.]), array([470., 71.]), array([462., 144.]),
array([439., 213.])]

```

Right\_elbow: STANDARD

Left\_elbow: NOT STANDARD

posed\_frame is <class 'numpy.ndarray'>

```
[[4.26000000e+02 1.05000000e+02 9.09586072e-01 0.
00000000e+00]
 [4.29000000e+02 8.30000000e+01 9.68281090e-01 1.
00000000e+00]
 [3.89000000e+02 8.70000000e+01 9.57480192e-01 2.
00000000e+00]
 [4.12000000e+02 1.64000000e+02 8.59294653e-01 3.
00000000e+00]
 [4.25000000e+02 2.19000000e+02 7.23724008e-01 4.
00000000e+00]
 [4.70000000e+02 7.40000000e+01 8.88618231e-01 5.
00000000e+00]
 [4.62000000e+02 1.44000000e+02 8.09123218e-01 6.
00000000e+00]
 [4.40000000e+02 2.16000000e+02 8.94820273e-01 7.
00000000e+00]
 [4.16000000e+02 1.36000000e+02 5.58977962e-01 8.
00000000e+00]
 [3.19000000e+02 2.50000000e+02 1.25443459e-01 9.
00000000e+00]
 [4.24000000e+02 2.24000000e+02 3.52578521e-01 1.
00000000e+01]
 [1.52000000e+02 2.53000000e+02 2.69110024e-01 1.
10000000e+01]
 [4.52000000e+02 2.68000000e+02 1.05120696e-01 1.
20000000e+01]
 [1.39000000e+02 2.76000000e+02 2.73880810e-01 1.
30000000e+01]
 [4.61000000e+02 1.34000000e+02 6.25623345e-01 1.
40000000e+01]
 [4.60000000e+02 2.21000000e+02 7.08479583e-01 1.
50000000e+01]
 [1.49000000e+02 2.51000000e+02 2.22179547e-01 1.
60000000e+01]
 [1.48000000e+02 2.52000000e+02 2.21856922e-01 1.
70000000e+01]
```

```

[1.47000000e+02 2.53000000e+02 2.21189976e-01 1.
80000000e+01]
[4.92000000e+02 2.53000000e+02 2.03164920e-01 1.
90000000e+01]
[1.33000000e+02 2.79000000e+02 3.27836841e-01 2.
00000000e+01]
[4.19000000e+02 1.00000000e+02 8.35696042e-01 2.
10000000e+01]
[4.33000000e+02 9.90000000e+01 8.60182941e-01 2.
20000000e+01]
[4.06000000e+02 9.10000000e+01 5.40956318e-01 2.
30000000e+01]
[4.44000000e+02 8.80000000e+01 7.77476609e-01 2.
40000000e+01]]
[[ 0.          1.          2.          3.          4
.          5.
 6.          7.          8.         10.         -1
.         14.
 15.         19.         21.         22.         23
.         24.
 25.7486524 17.      ]]
[array([389., 87.]), array([412., 164.]), array([425
., 219.]), array([470., 74.]), array([462., 144.]),
array([440., 216.])]
Right_elbow: STANDARD

Left_elbow: STANDARD

posed_frame is <class 'numpy.ndarray'>
[[4.25000000e+02 1.08000000e+02 8.37072909e-01 0.
00000000e+00]
[4.29000000e+02 8.40000000e+01 9.58119452e-01 1.
00000000e+00]
[3.90000000e+02 8.90000000e+01 9.57007468e-01 2.
00000000e+00]
[4.12000000e+02 1.66000000e+02 8.56467247e-01 3.
00000000e+00]
[4.26000000e+02 2.20000000e+02 7.27032542e-01 4.
00000000e+00]
[4.70000000e+02 7.50000000e+01 8.74828219e-01 5.
00000000e+00]

```

```

[4.63000000e+02 1.48000000e+02 7.79326677e-01 6.
00000000e+00]
[4.40000000e+02 2.18000000e+02 8.49568188e-01 7.
00000000e+00]
[4.17000000e+02 1.39000000e+02 5.78734756e-01 8.
00000000e+00]
[3.17000000e+02 2.50000000e+02 1.56317383e-01 9.
00000000e+00]
[4.24000000e+02 2.23000000e+02 3.47633928e-01 1.
00000000e+01]
[1.50000000e+02 2.56000000e+02 2.55863637e-01 1.
10000000e+01]
[1.49000000e+02 2.58000000e+02 2.54598171e-01 1.
20000000e+01]
[4.51000000e+02 2.70000000e+02 1.05198272e-01 1.
30000000e+01]
[1.38000000e+02 2.77000000e+02 3.00063193e-01 1.
40000000e+01]
[4.61000000e+02 1.37000000e+02 6.42802298e-01 1.
50000000e+01]
[4.59000000e+02 2.21000000e+02 7.21168876e-01 1.
60000000e+01]
[1.48000000e+02 2.53000000e+02 2.11199403e-01 1.
70000000e+01]
[4.93000000e+02 2.54000000e+02 2.25216717e-01 1.
80000000e+01]
[1.33000000e+02 2.79000000e+02 3.13073605e-01 1.
90000000e+01]
[4.18000000e+02 1.02000000e+02 7.84334898e-01 2.
00000000e+01]
[4.31000000e+02 1.02000000e+02 8.02782416e-01 2.
10000000e+01]
[4.07000000e+02 9.30000000e+01 4.67619598e-01 2.
20000000e+01]
[4.43000000e+02 9.10000000e+01 7.59814501e-01 2.
30000000e+01]]
[[ 0.          1.          2.          3.          4
.          5.
 6.          7.          8.          10.         -1
.          15.
 16.         18.         20.         21.         22

```

```

.      23.
25.18855883 17.      ]]
[array([390., 89.]), array([412., 166.]), array([426
., 220.]), array([470., 75.]), array([463., 148.]),
array([440., 218.])]
Right_elbow: STANDARD

Left_elbow: NOT STANDARD

posed_frame is <class 'numpy.ndarray'>
[[4.26000000e+02 1.08000000e+02 8.84306550e-01 0.
00000000e+00]
 [4.29000000e+02 8.30000000e+01 9.63473916e-01 1.
00000000e+00]
 [3.90000000e+02 8.70000000e+01 9.78513777e-01 2.
00000000e+00]
 [4.11000000e+02 1.62000000e+02 8.82968485e-01 3.
00000000e+00]
 [4.25000000e+02 2.18000000e+02 7.37339914e-01 4.
00000000e+00]
 [4.71000000e+02 7.50000000e+01 8.79840612e-01 5.
00000000e+00]
 [4.63000000e+02 1.49000000e+02 7.92270839e-01 6.
00000000e+00]
 [4.39000000e+02 2.16000000e+02 8.69907141e-01 7.
00000000e+00]
 [4.17000000e+02 1.39000000e+02 5.70739508e-01 8.
00000000e+00]
 [3.18000000e+02 2.52000000e+02 2.76170492e-01 9.
00000000e+00]
 [4.23000000e+02 2.23000000e+02 3.37060601e-01 1.
00000000e+01]
 [2.26000000e+02 2.51000000e+02 1.18311599e-01 1.
10000000e+01]
 [1.53000000e+02 2.53000000e+02 2.41805896e-01 1.
20000000e+01]
 [1.52000000e+02 2.54000000e+02 2.41406441e-01 1.
30000000e+01]
 [1.51000000e+02 2.55000000e+02 2.40666553e-01 1.
40000000e+01]
 [1.50000000e+02 2.56000000e+02 2.40102738e-01 1.

```

```

500000000e+01]
[1.34000000e+02 2.79000000e+02 3.62823129e-01 1.
600000000e+01]
[4.61000000e+02 1.37000000e+02 6.42139912e-01 1.
700000000e+01]
[3.21000000e+02 2.47000000e+02 2.08482891e-01 1.
800000000e+01]
[4.60000000e+02 2.21000000e+02 7.04639196e-01 1.
900000000e+01]
[1.51000000e+02 2.42000000e+02 2.56749392e-01 2.
000000000e+01]
[4.89000000e+02 2.57000000e+02 2.02810943e-01 2.
100000000e+01]
[1.32000000e+02 2.80000000e+02 2.79788345e-01 2.
200000000e+01]
[4.19000000e+02 1.02000000e+02 8.43528748e-01 2.
300000000e+01]
[4.33000000e+02 1.02000000e+02 8.59142661e-01 2.
400000000e+01]
[4.07000000e+02 9.10000000e+01 5.08034229e-01 2.
500000000e+01]
[4.44000000e+02 9.00000000e+01 7.64496505e-01 2.
600000000e+01]]
[[ 0.          1.          2.          3.          4
.          5.
  6.          7.          8.          10.         -1
.          17.
  19.         21.         23.         24.         25
.          26.
  25.83266563 17.          ]]
[array([390., 87.]), array([411., 162.]), array([425
., 218.]), array([471., 75.]), array([463., 149.]),
array([439., 216.])]
Right_elbow: STANDARD

Left_elbow: NOT STANDARD

posed_frame is <class 'numpy.ndarray'>
[[4.27000000e+02 1.02000000e+02 9.09052610e-01 0.
00000000e+00]
[4.29000000e+02 7.90000000e+01 9.71652269e-01 1.

```

```
00000000e+00]
[3.90000000e+02 8.30000000e+01 9.55691516e-01 2.
00000000e+00]
[4.10000000e+02 1.58000000e+02 8.97307992e-01 3.
00000000e+00]
[4.25000000e+02 2.18000000e+02 7.55661905e-01 4.
00000000e+00]
[4.71000000e+02 7.20000000e+01 9.00579989e-01 5.
00000000e+00]
[4.63000000e+02 1.46000000e+02 8.17165971e-01 6.
00000000e+00]
[4.39000000e+02 2.13000000e+02 8.79646897e-01 7.
00000000e+00]
[4.16000000e+02 1.39000000e+02 5.57126522e-01 8.
00000000e+00]
[3.17000000e+02 2.51000000e+02 3.10702831e-01 9.
00000000e+00]
[4.22000000e+02 2.20000000e+02 3.12348276e-01 1.
00000000e+01]
[2.28000000e+02 2.49000000e+02 1.46729678e-01 1.
10000000e+01]
[1.53000000e+02 2.51000000e+02 2.64610231e-01 1.
20000000e+01]
[1.34000000e+02 2.79000000e+02 3.56046379e-01 1.
30000000e+01]
[4.60000000e+02 1.36000000e+02 6.41882122e-01 1.
40000000e+01]
[3.18000000e+02 2.47000000e+02 2.37440035e-01 1.
50000000e+01]
[4.60000000e+02 2.21000000e+02 6.40462697e-01 1.
60000000e+01]
[2.06000000e+02 2.52000000e+02 1.15101315e-01 1.
70000000e+01]
[2.22000000e+02 2.53000000e+02 1.11856230e-01 1.
80000000e+01]
[1.50000000e+02 2.42000000e+02 2.75640607e-01 1.
90000000e+01]
[4.90000000e+02 2.55000000e+02 1.45978779e-01 2.
00000000e+01]
[1.32000000e+02 2.79000000e+02 2.80228913e-01 2.
10000000e+01]
```

```

[4.20000000e+02 9.40000000e+01 7.69668341e-01 2.
20000000e+01]
[4.34000000e+02 9.40000000e+01 8.18765521e-01 2.
30000000e+01]
[4.08000000e+02 8.50000000e+01 5.09985030e-01 2.
40000000e+01]
[4.45000000e+02 8.50000000e+01 7.56440520e-01 2.
50000000e+01]]
[[ 0.          1.          2.          3.          4
.          5.
 6.          7.          8.          10.         -1
.          14.
 16.         20.         22.         23.         24
.          25.
 25.21147403 17.          ]]
[array([390., 83.]), array([410., 158.]), array([425
., 218.]), array([471., 72.]), array([463., 146.]),
array([439., 213.])]
Right_elbow: STANDARD

Left_elbow: NOT STANDARD

posed_frame is <class 'numpy.ndarray'>
[[4.26000000e+02 9.50000000e+01 8.43276322e-01 0.
00000000e+00]
[4.30000000e+02 7.30000000e+01 9.68548119e-01 1.
00000000e+00]
[3.90000000e+02 7.60000000e+01 9.47840691e-01 2.
00000000e+00]
[4.10000000e+02 1.51000000e+02 9.09211874e-01 3.
00000000e+00]
[4.25000000e+02 2.13000000e+02 7.48656571e-01 4.
00000000e+00]
[4.71000000e+02 6.80000000e+01 8.82134020e-01 5.
00000000e+00]
[4.63000000e+02 1.41000000e+02 8.18294764e-01 6.
00000000e+00]
[4.39000000e+02 2.09000000e+02 8.55101526e-01 7.
00000000e+00]
[4.14000000e+02 1.38000000e+02 5.87425351e-01 8.
00000000e+00]

```

```

[3.21000000e+02 2.51000000e+02 3.04945201e-01 9.
00000000e+00]
[4.18000000e+02 2.20000000e+02 3.76473039e-01 1.
00000000e+01]
[2.29000000e+02 2.51000000e+02 1.54629648e-01 1.
10000000e+01]
[1.53000000e+02 2.51000000e+02 2.61580706e-01 1.
20000000e+01]
[4.52000000e+02 2.66000000e+02 1.04870386e-01 1.
30000000e+01]
[1.33000000e+02 2.79000000e+02 3.83745581e-01 1.
40000000e+01]
[4.59000000e+02 1.34000000e+02 6.51311934e-01 1.
50000000e+01]
[3.21000000e+02 2.48000000e+02 1.99157074e-01 1.
60000000e+01]
[4.60000000e+02 2.22000000e+02 6.72128439e-01 1.
70000000e+01]
[2.05000000e+02 2.51000000e+02 1.11318976e-01 1.
80000000e+01]
[1.49000000e+02 2.42000000e+02 2.79307902e-01 1.
90000000e+01]
[4.85000000e+02 2.61000000e+02 1.44072279e-01 2.
00000000e+01]
[1.31000000e+02 2.79000000e+02 2.63356447e-01 2.
10000000e+01]
[4.20000000e+02 8.80000000e+01 7.64676929e-01 2.
20000000e+01]
[4.33000000e+02 8.80000000e+01 7.97710180e-01 2.
30000000e+01]
[4.09000000e+02 7.80000000e+01 5.01187980e-01 2.
40000000e+01]
[4.45000000e+02 7.80000000e+01 7.26647139e-01 2.
50000000e+01]]
[[ 0.          1.          2.          3.          4
.          5.
 6.          7.          8.          10.         -1
.          15.
 17.         20.         22.         23.         24
.          25.
 25.08387389 17.      ]]

```

```
[array([390., 76.]), array([410., 151.]), array([425
., 213.]), array([471., 68.]), array([463., 141.]),
array([439., 209.])]
```

Right\_elbow: STANDARD

Left\_elbow: NOT STANDARD

posed\_frame is <class 'numpy.ndarray'>

```
[[4.27000000e+02 8.90000000e+01 9.47913051e-01 0.
00000000e+00]
```

```
 [4.30000000e+02 6.90000000e+01 9.56523955e-01 1.
00000000e+00]
```

```
 [3.90000000e+02 7.20000000e+01 9.79458869e-01 2.
00000000e+00]
```

```
 [4.08000000e+02 1.42000000e+02 8.96480203e-01 3.
00000000e+00]
```

```
 [4.23000000e+02 2.08000000e+02 7.23376632e-01 4.
00000000e+00]
```

```
 [4.71000000e+02 6.30000000e+01 9.01929140e-01 5.
00000000e+00]
```

```
 [4.62000000e+02 1.39000000e+02 8.10499430e-01 6.
00000000e+00]
```

```
 [4.38000000e+02 2.06000000e+02 8.52629006e-01 7.
00000000e+00]
```

```
 [4.14000000e+02 1.37000000e+02 6.34056270e-01 8.
00000000e+00]
```

```
 [3.20000000e+02 2.51000000e+02 2.63217896e-01 9.
00000000e+00]
```

```
 [4.19000000e+02 2.19000000e+02 4.28057045e-01 1.
00000000e+01]
```

```
 [2.30000000e+02 2.49000000e+02 1.23697653e-01 1.
10000000e+01]
```

```
 [2.29000000e+02 2.50000000e+02 1.23813465e-01 1.
20000000e+01]
```

```
 [1.53000000e+02 2.51000000e+02 2.64851511e-01 1.
30000000e+01]
```

```
 [4.50000000e+02 2.68000000e+02 1.07011557e-01 1.
40000000e+01]
```

```
 [1.33000000e+02 2.79000000e+02 3.53550792e-01 1.
50000000e+01]
```

```
 [4.59000000e+02 1.34000000e+02 6.84630632e-01 1.
```

```

600000000e+01]
[3.20000000e+02 2.49000000e+02 1.76885054e-01 1.
700000000e+01]
[4.62000000e+02 2.22000000e+02 7.04446912e-01 1.
800000000e+01]
[1.50000000e+02 2.42000000e+02 2.72727758e-01 1.
900000000e+01]
[4.87000000e+02 2.60000000e+02 1.47972628e-01 2.
000000000e+01]
[1.32000000e+02 2.79000000e+02 2.73191124e-01 2.
100000000e+01]
[4.21000000e+02 8.20000000e+01 8.36235166e-01 2.
200000000e+01]
[4.36000000e+02 8.20000000e+01 8.78038287e-01 2.
300000000e+01]
[4.08000000e+02 7.20000000e+01 5.37667215e-01 2.
400000000e+01]
[4.46000000e+02 7.10000000e+01 7.55529523e-01 2.
500000000e+01]]
[[ 0.          1.          2.          3.          4
.          5.
 6.          7.          8.          10.         -1
.          16.
 18.         20.         22.         23.         24
.          25.
 26.04412485 17.          ]]
[array([390., 72.]), array([408., 142.]), array([423
., 208.]), array([471., 63.]), array([462., 139.]),
array([438., 206.])]
Right_elbow: STANDARD

Left_elbow: NOT STANDARD

posed_frame is <class 'numpy.ndarray'>
[[4.27000000e+02 8.40000000e+01 9.42273200e-01 0.
00000000e+00]
[4.30000000e+02 6.50000000e+01 9.45081592e-01 1.
00000000e+00]
[3.91000000e+02 6.90000000e+01 9.42144334e-01 2.
00000000e+00]
[4.10000000e+02 1.41000000e+02 8.88225138e-01 3.

```

```

00000000e+00]
[4.22000000e+02 2.05000000e+02 7.70843983e-01 4.
00000000e+00]
[4.71000000e+02 6.00000000e+01 9.26655531e-01 5.
00000000e+00]
[4.59000000e+02 1.34000000e+02 8.37120175e-01 6.
00000000e+00]
[4.37000000e+02 2.02000000e+02 8.40928257e-01 7.
00000000e+00]
[4.13000000e+02 1.34000000e+02 6.53891683e-01 8.
00000000e+00]
[3.21000000e+02 2.51000000e+02 2.37831205e-01 9.
00000000e+00]
[4.18000000e+02 2.15000000e+02 4.54075456e-01 1.
00000000e+01]
[1.55000000e+02 2.50000000e+02 2.57577091e-01 1.
10000000e+01]
[1.33000000e+02 2.79000000e+02 3.35017830e-01 1.
20000000e+01]
[4.58000000e+02 1.29000000e+02 7.08371878e-01 1.
30000000e+01]
[3.21000000e+02 2.48000000e+02 1.54432192e-01 1.
40000000e+01]
[4.63000000e+02 2.14000000e+02 7.54759610e-01 1.
50000000e+01]
[1.50000000e+02 2.42000000e+02 2.67577559e-01 1.
60000000e+01]
[4.90000000e+02 2.59000000e+02 1.74018383e-01 1.
70000000e+01]
[1.31000000e+02 2.79000000e+02 2.80068725e-01 1.
80000000e+01]
[4.20000000e+02 7.50000000e+01 8.35119426e-01 1.
90000000e+01]
[4.35000000e+02 7.50000000e+01 8.85498524e-01 2.
00000000e+01]
[4.08000000e+02 6.50000000e+01 5.82250834e-01 2.
10000000e+01]
[4.47000000e+02 6.60000000e+01 7.22087026e-01 2.
20000000e+01]]
[[ 0.          1.          2.          3.          4
.          5.

```

```

    6.          7.          8.          10.         -1
.          13.
    15.          17.          19.          20.          21
.          22.
    26.42959909 17.          ]]
[array([391., 69.]), array([410., 141.]), array([422
., 205.]), array([471., 60.]), array([459., 134.]),
array([437., 202.])]
Right_elbow: STANDARD

Left_elbow: STANDARD

posed_frame is <class 'numpy.ndarray'>
[[4.26000000e+02 8.40000000e+01 9.61401105e-01 0.
00000000e+00]
 [4.30000000e+02 6.50000000e+01 9.41729188e-01 1.
00000000e+00]
 [3.91000000e+02 6.90000000e+01 9.46047902e-01 2.
00000000e+00]
 [4.10000000e+02 1.41000000e+02 8.91055346e-01 3.
00000000e+00]
 [4.22000000e+02 2.05000000e+02 7.72348166e-01 4.
00000000e+00]
 [4.71000000e+02 6.00000000e+01 9.27871227e-01 5.
00000000e+00]
 [4.60000000e+02 1.33000000e+02 8.29532027e-01 6.
00000000e+00]
 [4.37000000e+02 2.02000000e+02 8.41585815e-01 7.
00000000e+00]
 [4.13000000e+02 1.32000000e+02 6.45722330e-01 8.
00000000e+00]
 [3.21000000e+02 2.51000000e+02 2.35777989e-01 9.
00000000e+00]
 [4.18000000e+02 2.13000000e+02 4.37422574e-01 1.
00000000e+01]
 [1.56000000e+02 2.51000000e+02 2.50010788e-01 1.
10000000e+01]
 [1.55000000e+02 2.52000000e+02 2.49650791e-01 1.
20000000e+01]
 [1.35000000e+02 2.79000000e+02 3.20336550e-01 1.
30000000e+01]

```

```

[4.58000000e+02 1.28000000e+02 7.03935146e-01 1.
40000000e+01]
[3.21000000e+02 2.48000000e+02 1.50391072e-01 1.
50000000e+01]
[4.63000000e+02 2.14000000e+02 7.36763418e-01 1.
60000000e+01]
[1.51000000e+02 2.43000000e+02 2.44190380e-01 1.
70000000e+01]
[4.90000000e+02 2.59000000e+02 1.88257009e-01 1.
80000000e+01]
[1.32000000e+02 2.80000000e+02 2.73043483e-01 1.
90000000e+01]
[4.19000000e+02 7.50000000e+01 8.52748692e-01 2.
00000000e+01]
[4.34000000e+02 7.50000000e+01 9.01580453e-01 2.
10000000e+01]
[4.07000000e+02 6.50000000e+01 5.39037585e-01 2.
20000000e+01]
[4.47000000e+02 6.60000000e+01 7.55017459e-01 2.
30000000e+01]]
[[ 0.      1.      2.      3.      4
.      5.
 6.      7.      8.     10.     -1
.     14.
 16.     18.     20.     21.     22
.     23.
 26.5709951 17.    ]]
[array([391., 69.]), array([410., 141.]), array([422
., 205.]), array([471., 60.]), array([460., 133.]),
array([437., 202.])]
Right_elbow: STANDARD

Left_elbow: STANDARD

posed_frame is <class 'numpy.ndarray'>
[[4.27000000e+02 8.50000000e+01 9.59548652e-01 0.
00000000e+00]
 [4.30000000e+02 6.60000000e+01 9.47278261e-01 1.
00000000e+00]
 [3.91000000e+02 7.00000000e+01 9.47732210e-01 2.
00000000e+00]

```

```

[4.10000000e+02 1.43000000e+02 8.72088671e-01 3.
00000000e+00]
[4.23000000e+02 2.05000000e+02 7.67173171e-01 4.
00000000e+00]
[4.71000000e+02 6.00000000e+01 9.23722982e-01 5.
00000000e+00]
[4.61000000e+02 1.33000000e+02 8.14804196e-01 6.
00000000e+00]
[4.38000000e+02 2.03000000e+02 8.42539489e-01 7.
00000000e+00]
[4.13000000e+02 1.34000000e+02 6.52247727e-01 8.
00000000e+00]
[3.22000000e+02 2.50000000e+02 2.71895379e-01 9.
00000000e+00]
[4.19000000e+02 2.14000000e+02 4.34351325e-01 1.
00000000e+01]
[1.54000000e+02 2.52000000e+02 2.63679653e-01 1.
10000000e+01]
[1.36000000e+02 2.79000000e+02 3.14954251e-01 1.
20000000e+01]
[4.58000000e+02 1.30000000e+02 7.16715991e-01 1.
30000000e+01]
[3.24000000e+02 2.48000000e+02 1.91445604e-01 1.
40000000e+01]
[4.63000000e+02 2.15000000e+02 7.24708617e-01 1.
50000000e+01]
[1.51000000e+02 2.43000000e+02 2.53212810e-01 1.
60000000e+01]
[4.89000000e+02 2.56000000e+02 1.40151665e-01 1.
70000000e+01]
[1.32000000e+02 2.80000000e+02 2.78370112e-01 1.
80000000e+01]
[4.20000000e+02 7.60000000e+01 8.36009145e-01 1.
90000000e+01]
[4.35000000e+02 7.60000000e+01 8.83968055e-01 2.
00000000e+01]
[4.08000000e+02 6.60000000e+01 5.83609462e-01 2.
10000000e+01]
[4.46000000e+02 6.70000000e+01 7.17896819e-01 2.
20000000e+01]]
[[ 0.          1.          2.          3.          4

```

```

.          5.
  6.          7.          8.          10.          -1
.          13.
  15.          17.          19.          20.          21
.          22.
  26.28153865 17.          ]]
[array([391., 70.]), array([410., 143.]), array([423
., 205.]), array([471., 60.]), array([461., 133.]),
array([438., 203.])]
Right_elbow: STANDARD

Left_elbow: STANDARD

posed_frame is <class 'numpy.ndarray'>
[[4.27000000e+02 8.70000000e+01 9.59956646e-01 0.
00000000e+00]
 [4.30000000e+02 6.80000000e+01 9.56661880e-01 1.
00000000e+00]
 [3.91000000e+02 7.00000000e+01 9.63004112e-01 2.
00000000e+00]
 [4.10000000e+02 1.45000000e+02 8.86033416e-01 3.
00000000e+00]
 [4.24000000e+02 2.09000000e+02 7.75757134e-01 4.
00000000e+00]
 [4.71000000e+02 6.20000000e+01 9.17711735e-01 5.
00000000e+00]
 [4.62000000e+02 1.36000000e+02 8.26482475e-01 6.
00000000e+00]
 [4.39000000e+02 2.05000000e+02 8.34203482e-01 7.
00000000e+00]
 [4.13000000e+02 1.35000000e+02 6.26770377e-01 8.
00000000e+00]
 [3.22000000e+02 2.50000000e+02 2.89397061e-01 9.
00000000e+00]
 [4.20000000e+02 2.18000000e+02 3.96210432e-01 1.
00000000e+01]
 [2.36000000e+02 2.48000000e+02 1.07821666e-01 1.
10000000e+01]
 [1.56000000e+02 2.52000000e+02 2.71812856e-01 1.
20000000e+01]
 [1.37000000e+02 2.79000000e+02 3.21587086e-01 1.

```

```

300000000e+01]
[4.57000000e+02 1.31000000e+02 6.94264889e-01 1.
400000000e+01]
[3.22000000e+02 2.49000000e+02 2.20647946e-01 1.
500000000e+01]
[4.60000000e+02 2.19000000e+02 6.93422437e-01 1.
600000000e+01]
[1.53000000e+02 2.44000000e+02 2.46010914e-01 1.
700000000e+01]
[4.85000000e+02 2.65000000e+02 1.45321921e-01 1.
800000000e+01]
[1.32000000e+02 2.80000000e+02 2.97716081e-01 1.
900000000e+01]
[4.21000000e+02 8.00000000e+01 8.27762783e-01 2.
000000000e+01]
[4.36000000e+02 7.90000000e+01 8.80753100e-01 2.
100000000e+01]
[4.08000000e+02 7.00000000e+01 5.51865458e-01 2.
200000000e+01]
[4.46000000e+02 7.00000000e+01 7.45135605e-01 2.
300000000e+01]]
[[ 0.          1.          2.          3.          4
.          5.
  6.          7.          8.          10.         -1
.          14.
  16.         18.         20.         21.         22
.          23.
  26.20349817 17.          ]]
[array([391., 70.]), array([410., 145.]), array([424
., 209.]), array([471., 62.]), array([462., 136.]),
array([439., 205.])]
Right_elbow: STANDARD

Left_elbow: NOT STANDARD

posed_frame is <class 'numpy.ndarray'>
[[4.28000000e+02 1.02000000e+02 9.26633120e-01 0.
00000000e+00]
[4.29000000e+02 7.80000000e+01 9.67882454e-01 1.
00000000e+00]
[3.90000000e+02 8.10000000e+01 9.21113491e-01 2.

```

```
00000000e+00]
[4.11000000e+02 1.63000000e+02 8.84301901e-01 3.
00000000e+00]
[4.24000000e+02 2.18000000e+02 7.17335880e-01 4.
00000000e+00]
[4.70000000e+02 7.10000000e+01 9.02328014e-01 5.
00000000e+00]
[4.63000000e+02 1.44000000e+02 8.35447729e-01 6.
00000000e+00]
[4.39000000e+02 2.13000000e+02 9.41222727e-01 7.
00000000e+00]
[4.15000000e+02 1.38000000e+02 5.31212211e-01 8.
00000000e+00]
[3.19000000e+02 2.51000000e+02 2.32327580e-01 9.
00000000e+00]
[4.23000000e+02 2.22000000e+02 2.70669669e-01 1.
00000000e+01]
[1.56000000e+02 2.53000000e+02 2.70761788e-01 1.
10000000e+01]
[1.37000000e+02 2.78000000e+02 3.12008709e-01 1.
20000000e+01]
[4.59000000e+02 1.35000000e+02 6.07224762e-01 1.
30000000e+01]
[3.20000000e+02 2.45000000e+02 1.69285640e-01 1.
40000000e+01]
[4.59000000e+02 2.22000000e+02 5.14894664e-01 1.
50000000e+01]
[1.53000000e+02 2.47000000e+02 2.19086483e-01 1.
60000000e+01]
[4.94000000e+02 2.52000000e+02 1.85085982e-01 1.
70000000e+01]
[1.32000000e+02 2.80000000e+02 3.00472826e-01 1.
80000000e+01]
[4.21000000e+02 9.40000000e+01 7.98695445e-01 1.
90000000e+01]
[4.35000000e+02 9.40000000e+01 8.71649444e-01 2.
00000000e+01]
[4.07000000e+02 8.50000000e+01 5.96889734e-01 2.
10000000e+01]
[4.45000000e+02 8.50000000e+01 7.47604787e-01 2.
20000000e+01]]
```

```

[[ 0.      1.      2.      3.      4
   5.
   6.      7.      8.      10.     -1
   13.
   15.     17.     19.     20.     21
   22.
  25.35545124 17.      ]]
[array([390., 81.]), array([411., 163.]), array([424
., 218.]), array([470., 71.]), array([463., 144.]),
array([439., 213.])]
Right_elbow: STANDARD

```

Left\_elbow: NOT STANDARD

```

posed_frame is <class 'numpy.ndarray'>
[[4.26000000e+02 1.09000000e+02 8.61707449e-01 0.
00000000e+00]
 [4.30000000e+02 8.30000000e+01 9.76272106e-01 1.
00000000e+00]
 [3.90000000e+02 8.70000000e+01 9.65334415e-01 2.
00000000e+00]
 [4.11000000e+02 1.63000000e+02 8.77257109e-01 3.
00000000e+00]
 [4.25000000e+02 2.19000000e+02 7.34625876e-01 4.
00000000e+00]
 [4.70000000e+02 7.40000000e+01 8.85673583e-01 5.
00000000e+00]
 [4.64000000e+02 1.46000000e+02 7.93915927e-01 6.
00000000e+00]
 [4.39000000e+02 2.16000000e+02 8.72263789e-01 7.
00000000e+00]
 [4.16000000e+02 1.38000000e+02 5.44141769e-01 8.
00000000e+00]
 [3.19000000e+02 2.50000000e+02 1.32201076e-01 9.
00000000e+00]
 [4.24000000e+02 2.24000000e+02 3.65560800e-01 1.
00000000e+01]
 [1.54000000e+02 2.53000000e+02 2.59090900e-01 1.
10000000e+01]
 [1.38000000e+02 2.77000000e+02 2.75779575e-01 1.
20000000e+01]

```

```

[4.60000000e+02 1.35000000e+02 6.07466578e-01 1.
30000000e+01]
[4.59000000e+02 2.20000000e+02 7.29542971e-01 1.
40000000e+01]
[1.52000000e+02 2.49000000e+02 2.06470296e-01 1.
50000000e+01]
[4.94000000e+02 2.53000000e+02 2.60983914e-01 1.
60000000e+01]
[1.32000000e+02 2.80000000e+02 3.08322757e-01 1.
70000000e+01]
[4.19000000e+02 1.03000000e+02 8.13522160e-01 1.
80000000e+01]
[4.33000000e+02 1.02000000e+02 8.45593929e-01 1.
90000000e+01]
[4.07000000e+02 9.20000000e+01 5.22189200e-01 2.
00000000e+01]
[4.44000000e+02 9.10000000e+01 7.53858626e-01 2.
10000000e+01]]
[[ 0.      1.      2.      3.      4.      5
.      6.
 7.      8.      10.     -1.      13.     14
.      16.
 18.     19.     20.     21.     25.746625 17
.    ]]
[array([390., 87.]), array([411., 163.]), array([425
., 219.]), array([470., 74.]), array([464., 146.]),
array([439., 216.])]
Right_elbow: STANDARD

Left_elbow: NOT STANDARD

posed_frame is <class 'numpy.ndarray'>
[[4.26000000e+02 1.11000000e+02 7.94788539e-01 0.
00000000e+00]
[4.29000000e+02 8.60000000e+01 9.80483890e-01 1.
00000000e+00]
[3.90000000e+02 8.90000000e+01 9.55419779e-01 2.
00000000e+00]
[4.12000000e+02 1.68000000e+02 8.70648265e-01 3.
00000000e+00]
[4.27000000e+02 2.22000000e+02 7.33196974e-01 4.

```

```

00000000e+00]
[4.70000000e+02 7.70000000e+01 8.77255142e-01 5.
00000000e+00]
[4.66000000e+02 1.47000000e+02 7.93299675e-01 6.
00000000e+00]
[4.40000000e+02 2.18000000e+02 8.14209998e-01 7.
00000000e+00]
[4.16000000e+02 1.38000000e+02 5.23790359e-01 8.
00000000e+00]
[3.19000000e+02 2.50000000e+02 1.13902062e-01 9.
00000000e+00]
[4.24000000e+02 2.24000000e+02 3.31889182e-01 1.
00000000e+01]
[1.54000000e+02 2.53000000e+02 2.55088151e-01 1.
10000000e+01]
[1.37000000e+02 2.77000000e+02 2.85365462e-01 1.
20000000e+01]
[4.60000000e+02 1.36000000e+02 6.06401742e-01 1.
30000000e+01]
[4.60000000e+02 2.19000000e+02 7.12752938e-01 1.
40000000e+01]
[1.52000000e+02 2.49000000e+02 2.02747554e-01 1.
50000000e+01]
[4.95000000e+02 2.53000000e+02 3.02782178e-01 1.
60000000e+01]
[1.32000000e+02 2.80000000e+02 2.94165105e-01 1.
70000000e+01]
[4.21000000e+02 1.05000000e+02 7.17803240e-01 1.
80000000e+01]
[4.32000000e+02 1.05000000e+02 7.56130338e-01 1.
90000000e+01]
[4.08000000e+02 9.70000000e+01 4.93227422e-01 2.
00000000e+01]
[4.43000000e+02 9.50000000e+01 7.22570598e-01 2.
10000000e+01]]
[[ 0.          1.          2.          3.          4
.          5.
 6.          7.          8.          10.         -1
.          13.
 14.         16.         18.          19.         20
.          21.

```

```

25.03784355 17.      ]]
[array([390.,  89.]), array([412., 168.]), array([427
., 222.]), array([470.,  77.]), array([466., 147.]),
array([440., 218.])]
Right_elbow: STANDARD

```

```

Left_elbow: NOT STANDARD

```

```

posed_frame is <class 'numpy.ndarray'>
[[4.28000000e+02 1.08000000e+02 8.32540751e-01 0.
00000000e+00]
 [4.29000000e+02 8.40000000e+01 9.74071085e-01 1.
00000000e+00]
 [3.90000000e+02 8.80000000e+01 9.70128953e-01 2.
00000000e+00]
 [4.12000000e+02 1.66000000e+02 8.92200887e-01 3.
00000000e+00]
 [4.25000000e+02 2.20000000e+02 7.29180217e-01 4.
00000000e+00]
 [4.70000000e+02 7.50000000e+01 8.81368697e-01 5.
00000000e+00]
 [4.64000000e+02 1.48000000e+02 7.88341999e-01 6.
00000000e+00]
 [4.39000000e+02 2.17000000e+02 8.49116325e-01 7.
00000000e+00]
 [4.17000000e+02 1.38000000e+02 5.37860036e-01 8.
00000000e+00]
 [3.17000000e+02 2.52000000e+02 2.28101850e-01 9.
00000000e+00]
 [4.23000000e+02 2.23000000e+02 3.37356448e-01 1.
00000000e+01]
 [1.55000000e+02 2.52000000e+02 2.53899127e-01 1.
10000000e+01]
 [4.57000000e+02 2.68000000e+02 1.23896658e-01 1.
20000000e+01]
 [1.35000000e+02 2.78000000e+02 3.14884841e-01 1.
30000000e+01]
 [4.61000000e+02 1.36000000e+02 6.16927981e-01 1.
40000000e+01]
 [3.21000000e+02 2.46000000e+02 1.67675048e-01 1.
50000000e+01]

```

```

[4.59000000e+02 2.20000000e+02 7.28254616e-01 1.
60000000e+01]
[1.53000000e+02 2.45000000e+02 2.18093395e-01 1.
70000000e+01]
[4.94000000e+02 2.54000000e+02 2.81042159e-01 1.
80000000e+01]
[1.32000000e+02 2.80000000e+02 2.96446174e-01 1.
90000000e+01]
[4.22000000e+02 1.03000000e+02 7.97239244e-01 2.
00000000e+01]
[4.34000000e+02 1.02000000e+02 8.14686894e-01 2.
10000000e+01]
[4.09000000e+02 9.40000000e+01 5.53061962e-01 2.
20000000e+01]
[4.45000000e+02 9.10000000e+01 7.10393846e-01 2.
30000000e+01]]
[[ 0.          1.          2.          3.          4
.          5.
 6.          7.          8.          10.         -1
.          14.
 16.         18.         20.         21.         22
.          23.
 25.64566808 17.          ]]
[array([390., 88.]), array([412., 166.]), array([425
., 220.]), array([470., 75.]), array([464., 148.]),
array([439., 217.])]
Right_elbow: STANDARD

Left_elbow: NOT STANDARD

posed_frame is <class 'numpy.ndarray'>
[[4.29000000e+02 9.90000000e+01 8.95034254e-01 0.
00000000e+00]
[4.30000000e+02 7.50000000e+01 9.59154010e-01 1.
00000000e+00]
[3.91000000e+02 7.80000000e+01 9.22747016e-01 2.
00000000e+00]
[4.11000000e+02 1.60000000e+02 8.60894382e-01 3.
00000000e+00]
[4.24000000e+02 2.17000000e+02 7.63359547e-01 4.
00000000e+00]

```

[4.70000000e+02 7.00000000e+01 8.89553726e-01 5.  
00000000e+00]  
[4.63000000e+02 1.44000000e+02 8.11898828e-01 6.  
00000000e+00]  
[4.39000000e+02 2.10000000e+02 8.74398291e-01 7.  
00000000e+00]  
[4.14000000e+02 1.36000000e+02 5.64778924e-01 8.  
00000000e+00]  
[3.21000000e+02 2.51000000e+02 2.91839570e-01 9.  
00000000e+00]  
[4.19000000e+02 2.20000000e+02 3.22353184e-01 1.  
00000000e+01]  
[2.32000000e+02 2.49000000e+02 1.60334215e-01 1.  
10000000e+01]  
[1.56000000e+02 2.52000000e+02 2.59643674e-01 1.  
20000000e+01]  
[1.34000000e+02 2.79000000e+02 3.68726850e-01 1.  
30000000e+01]  
[4.58000000e+02 1.34000000e+02 6.26272619e-01 1.  
40000000e+01]  
[3.22000000e+02 2.47000000e+02 2.20794871e-01 1.  
50000000e+01]  
[4.59000000e+02 2.22000000e+02 6.32826209e-01 1.  
60000000e+01]  
[2.07000000e+02 2.51000000e+02 1.16789170e-01 1.  
70000000e+01]  
[2.25000000e+02 2.52000000e+02 1.17421038e-01 1.  
80000000e+01]  
[1.51000000e+02 2.42000000e+02 2.66643435e-01 1.  
90000000e+01]  
[4.91000000e+02 2.56000000e+02 1.79950565e-01 2.  
00000000e+01]  
[1.32000000e+02 2.80000000e+02 2.76157886e-01 2.  
10000000e+01]  
[4.23000000e+02 9.00000000e+01 8.09454381e-01 2.  
20000000e+01]  
[4.36000000e+02 9.00000000e+01 8.41005862e-01 2.  
30000000e+01]  
[4.09000000e+02 8.10000000e+01 6.19459629e-01 2.  
40000000e+01]  
[4.47000000e+02 8.00000000e+01 6.72571898e-01 2.

```

500000000e+01]]
[[ 0.          1.          2.          3.          4
.          5.
  6.          7.          8.          10.         -1
.          14.
  16.         20.         22.         23.         24
.          25.
  25.14728137 17.          ]]
[array([391., 78.]), array([411., 160.]), array([424
., 217.]), array([470., 70.]), array([463., 144.]),
array([439., 210.])]
Right_elbow: STANDARD

Left_elbow: NOT STANDARD

posed_frame is <class 'numpy.ndarray'>
[[4.27000000e+02 9.10000000e+01 8.72462273e-01 0.
00000000e+00]
 [4.31000000e+02 7.00000000e+01 9.48617041e-01 1.
00000000e+00]
 [3.91000000e+02 7.30000000e+01 9.53687191e-01 2.
00000000e+00]
 [4.11000000e+02 1.52000000e+02 8.72873843e-01 3.
00000000e+00]
 [4.23000000e+02 2.13000000e+02 7.15592504e-01 4.
00000000e+00]
 [4.71000000e+02 6.40000000e+01 8.96241903e-01 5.
00000000e+00]
 [4.63000000e+02 1.39000000e+02 8.08116794e-01 6.
00000000e+00]
 [4.38000000e+02 2.08000000e+02 8.49784672e-01 7.
00000000e+00]
 [4.16000000e+02 1.39000000e+02 5.86500347e-01 8.
00000000e+00]
 [3.21000000e+02 2.50000000e+02 3.21349442e-01 9.
00000000e+00]
 [4.19000000e+02 2.20000000e+02 3.46181571e-01 1.
00000000e+01]
 [2.30000000e+02 2.49000000e+02 1.62841991e-01 1.
10000000e+01]
 [1.56000000e+02 2.52000000e+02 2.56179303e-01 1.

```

```

20000000e+01]
[4.52000000e+02 2.67000000e+02 1.22643381e-01 1.
30000000e+01]
[1.35000000e+02 2.79000000e+02 3.44187379e-01 1.
40000000e+01]
[4.60000000e+02 1.35000000e+02 6.57381177e-01 1.
50000000e+01]
[3.21000000e+02 2.49000000e+02 2.53424346e-01 1.
60000000e+01]
[4.60000000e+02 2.22000000e+02 6.90359294e-01 1.
70000000e+01]
[2.06000000e+02 2.51000000e+02 1.29988581e-01 1.
80000000e+01]
[2.24000000e+02 2.52000000e+02 1.29041463e-01 1.
90000000e+01]
[1.51000000e+02 2.42000000e+02 2.74728268e-01 2.
00000000e+01]
[4.91000000e+02 2.58000000e+02 2.04437196e-01 2.
10000000e+01]
[1.31000000e+02 2.80000000e+02 2.99279928e-01 2.
20000000e+01]
[4.21000000e+02 8.50000000e+01 7.88314104e-01 2.
30000000e+01]
[4.35000000e+02 8.40000000e+01 8.26960266e-01 2.
40000000e+01]
[4.08000000e+02 7.50000000e+01 5.53674102e-01 2.
50000000e+01]
[4.46000000e+02 7.40000000e+01 7.04425335e-01 2.
60000000e+01]]
[[ 0.          1.          2.          3.          4
.          5.
 6.          7.          8.          10.         13
.          15.
 17.         21.         23.         24.         25
.          26.
 25.52647147 18.          ]]
[array([391., 73.]), array([411., 152.]), array([423
., 213.]), array([471., 64.]), array([463., 139.]),
array([438., 208.])]
Right_elbow: STANDARD

```

Left\_elbow: NOT STANDARD

posed\_frame is <class 'numpy.ndarray'>

```
[[4.25000000e+02 8.70000000e+01 9.74783540e-01 0.
00000000e+00]
 [4.30000000e+02 6.80000000e+01 9.60803390e-01 1.
00000000e+00]
 [3.92000000e+02 7.00000000e+01 9.56962168e-01 2.
00000000e+00]
 [4.10000000e+02 1.43000000e+02 8.55647326e-01 3.
00000000e+00]
 [4.23000000e+02 2.08000000e+02 7.53053308e-01 4.
00000000e+00]
 [4.71000000e+02 6.10000000e+01 9.13521171e-01 5.
00000000e+00]
 [4.61000000e+02 1.35000000e+02 7.80244350e-01 6.
00000000e+00]
 [4.38000000e+02 2.04000000e+02 8.19710016e-01 7.
00000000e+00]
 [4.14000000e+02 1.33000000e+02 6.29317403e-01 8.
00000000e+00]
 [3.23000000e+02 2.50000000e+02 3.16537410e-01 9.
00000000e+00]
 [4.19000000e+02 2.14000000e+02 3.77612442e-01 1.
00000000e+01]
 [2.30000000e+02 2.50000000e+02 1.52043521e-01 1.
10000000e+01]
 [1.56000000e+02 2.52000000e+02 2.61566669e-01 1.
20000000e+01]
 [4.47000000e+02 2.65000000e+02 1.03222877e-01 1.
30000000e+01]
 [1.35000000e+02 2.79000000e+02 3.36401045e-01 1.
40000000e+01]
 [4.58000000e+02 1.29000000e+02 6.96184933e-01 1.
50000000e+01]
 [3.22000000e+02 2.48000000e+02 2.47899011e-01 1.
60000000e+01]
 [4.61000000e+02 2.16000000e+02 7.17587233e-01 1.
70000000e+01]
 [2.05000000e+02 2.52000000e+02 1.19036764e-01 1.
80000000e+01]
```

```

[2.24000000e+02 2.53000000e+02 1.15987979e-01 1.
90000000e+01]
[1.51000000e+02 2.42000000e+02 2.65500307e-01 2.
00000000e+01]
[4.92000000e+02 2.55000000e+02 2.54769713e-01 2.
10000000e+01]
[1.31000000e+02 2.80000000e+02 2.89266169e-01 2.
20000000e+01]
[4.19000000e+02 7.90000000e+01 8.07726502e-01 2.
30000000e+01]
[4.34000000e+02 7.90000000e+01 8.60198140e-01 2.
40000000e+01]
[4.07000000e+02 7.00000000e+01 5.41654944e-01 2.
50000000e+01]
[4.45000000e+02 7.10000000e+01 7.60305285e-01 2.
60000000e+01]]
[[ 0.          1.          2.          3.          4
.          5.
 6.          7.          8.          10.         13
.          15.
 17.         21.          23.          24.         25
.          26.
 26.3475301 18.          ]]
[array([392., 70.]), array([410., 143.]), array([423
., 208.]), array([471., 61.]), array([461., 135.]),
array([438., 204.])]
Right_elbow: STANDARD

Left_elbow: STANDARD

posed_frame is <class 'numpy.ndarray'>
[[4.32000000e+02 8.40000000e+01 9.12739396e-01 0.
00000000e+00]
[4.30000000e+02 6.60000000e+01 9.53928053e-01 1.
00000000e+00]
[3.92000000e+02 6.90000000e+01 9.37378764e-01 2.
00000000e+00]
[4.10000000e+02 1.38000000e+02 8.80585849e-01 3.
00000000e+00]
[4.22000000e+02 2.04000000e+02 7.72068381e-01 4.
00000000e+00]

```

```

[4.71000000e+02 6.00000000e+01 9.09757674e-01 5.
00000000e+00]
[4.60000000e+02 1.33000000e+02 8.02222610e-01 6.
00000000e+00]
[4.37000000e+02 2.02000000e+02 8.44626963e-01 7.
00000000e+00]
[4.13000000e+02 1.30000000e+02 6.39883757e-01 8.
00000000e+00]
[3.23000000e+02 2.50000000e+02 2.83358693e-01 9.
00000000e+00]
[4.19000000e+02 2.12000000e+02 4.35088724e-01 1.
00000000e+01]
[2.31000000e+02 2.50000000e+02 1.30790234e-01 1.
10000000e+01]
[1.56000000e+02 2.52000000e+02 2.55779475e-01 1.
20000000e+01]
[1.35000000e+02 2.78000000e+02 3.22248876e-01 1.
30000000e+01]
[4.58000000e+02 1.26000000e+02 6.99409902e-01 1.
40000000e+01]
[3.24000000e+02 2.48000000e+02 2.15772480e-01 1.
50000000e+01]
[4.62000000e+02 2.13000000e+02 7.31599808e-01 1.
60000000e+01]
[2.04000000e+02 2.53000000e+02 1.03788182e-01 1.
70000000e+01]
[1.51000000e+02 2.43000000e+02 2.56345272e-01 1.
80000000e+01]
[4.94000000e+02 2.55000000e+02 2.36538529e-01 1.
90000000e+01]
[1.31000000e+02 2.79000000e+02 2.86911368e-01 2.
00000000e+01]
[4.25000000e+02 7.50000000e+01 8.36248040e-01 2.
10000000e+01]
[4.39000000e+02 7.50000000e+01 8.70620191e-01 2.
20000000e+01]
[4.11000000e+02 6.60000000e+01 6.50167465e-01 2.
30000000e+01]
[4.49000000e+02 6.50000000e+01 5.96984684e-01 2.
40000000e+01]]
[[ 0.          1.          2.          3.          4

```

```

.          5.
  6.          7.          8.          10.          -1
.          14.
 16.          19.          21.          22.          23
.          24.
 26.15757238 17.          ]]
[array([392., 69.]), array([410., 138.]), array([422
., 204.]), array([471., 60.]), array([460., 133.]),
array([437., 202.])]
Right_elbow: STANDARD

Left_elbow: STANDARD

posed_frame is <class 'numpy.ndarray'>
[[4.33000000e+02 8.60000000e+01 9.30953741e-01 0.
00000000e+00]
 [4.30000000e+02 6.60000000e+01 9.53709841e-01 1.
00000000e+00]
 [3.92000000e+02 6.90000000e+01 9.27936137e-01 2.
00000000e+00]
 [4.10000000e+02 1.40000000e+02 8.59914243e-01 3.
00000000e+00]
 [4.23000000e+02 2.05000000e+02 7.83385873e-01 4.
00000000e+00]
 [4.71000000e+02 6.00000000e+01 9.16336715e-01 5.
00000000e+00]
 [4.61000000e+02 1.33000000e+02 7.87260056e-01 6.
00000000e+00]
 [4.37000000e+02 2.02000000e+02 8.48183692e-01 7.
00000000e+00]
 [4.13000000e+02 1.29000000e+02 6.41665757e-01 8.
00000000e+00]
 [3.21000000e+02 2.49000000e+02 3.09791505e-01 9.
00000000e+00]
 [4.19000000e+02 2.11000000e+02 4.03193712e-01 1.
00000000e+01]
 [2.30000000e+02 2.50000000e+02 1.29214793e-01 1.
10000000e+01]
 [1.53000000e+02 2.56000000e+02 2.42039159e-01 1.
20000000e+01]
 [1.52000000e+02 2.57000000e+02 2.41402462e-01 1.

```

```

300000000e+01]
[1.360000000e+02 2.790000000e+02 3.34513783e-01 1.
400000000e+01]
[4.580000000e+02 1.260000000e+02 6.99271858e-01 1.
500000000e+01]
[3.210000000e+02 2.480000000e+02 2.50162750e-01 1.
600000000e+01]
[4.610000000e+02 2.150000000e+02 7.02136815e-01 1.
700000000e+01]
[2.020000000e+02 2.520000000e+02 1.09926991e-01 1.
800000000e+01]
[2.240000000e+02 2.530000000e+02 1.04412742e-01 1.
900000000e+01]
[1.510000000e+02 2.420000000e+02 2.59068400e-01 2.
000000000e+01]
[4.920000000e+02 2.530000000e+02 1.95728973e-01 2.
100000000e+01]
[1.310000000e+02 2.800000000e+02 3.03429931e-01 2.
200000000e+01]
[4.250000000e+02 7.700000000e+01 8.50287974e-01 2.
300000000e+01]
[4.390000000e+02 7.700000000e+01 8.90360951e-01 2.
400000000e+01]
[4.100000000e+02 6.800000000e+01 7.03920245e-01 2.
500000000e+01]
[4.490000000e+02 6.700000000e+01 6.08558297e-01 2.
600000000e+01]]
[[ 0.          1.          2.          3.          4
.          5.
 6.          7.          8.          10.         -1
.          15.
 17.         21.         23.         24.         25
.          26.
 26.36597018 17.          ]]
[array([392., 69.]), array([410., 140.]), array([423
., 205.]), array([471., 60.]), array([461., 133.]),
array([437., 202.])]
Right_elbow: STANDARD

Left_elbow: STANDARD

```

```

posed_frame is <class 'numpy.ndarray'>
[[4.27000000e+02 8.80000000e+01 9.28012669e-01 0.
 00000000e+00]
 [4.31000000e+02 6.80000000e+01 9.60637927e-01 1.
 00000000e+00]
 [3.92000000e+02 7.10000000e+01 9.65923846e-01 2.
 00000000e+00]
 [4.10000000e+02 1.41000000e+02 8.67385685e-01 3.
 00000000e+00]
 [4.23000000e+02 2.07000000e+02 7.64815032e-01 4.
 00000000e+00]
 [4.71000000e+02 6.20000000e+01 9.02223229e-01 5.
 00000000e+00]
 [4.62000000e+02 1.36000000e+02 7.89432287e-01 6.
 00000000e+00]
 [4.38000000e+02 2.05000000e+02 8.45338225e-01 7.
 00000000e+00]
 [4.16000000e+02 1.28000000e+02 6.03055358e-01 8.
 00000000e+00]
 [3.20000000e+02 2.49000000e+02 2.88290292e-01 9.
 00000000e+00]
 [4.19000000e+02 2.11000000e+02 3.78857136e-01 1.
 00000000e+01]
 [2.30000000e+02 2.50000000e+02 1.27740026e-01 1.
 10000000e+01]
 [1.55000000e+02 2.54000000e+02 2.50931650e-01 1.
 20000000e+01]
 [4.49000000e+02 2.66000000e+02 1.05625227e-01 1.
 30000000e+01]
 [1.38000000e+02 2.79000000e+02 3.05596381e-01 1.
 40000000e+01]
 [4.59000000e+02 1.25000000e+02 6.72726810e-01 1.
 50000000e+01]
 [3.21000000e+02 2.48000000e+02 2.35304460e-01 1.
 60000000e+01]
 [4.60000000e+02 2.14000000e+02 6.93192959e-01 1.
 70000000e+01]
 [4.61000000e+02 2.15000000e+02 6.93029106e-01 1.
 80000000e+01]
 [2.03000000e+02 2.53000000e+02 1.09253392e-01 1.
 90000000e+01]

```

```

[2.24000000e+02 2.54000000e+02 1.03627041e-01 2.
00000000e+01]
[1.52000000e+02 2.43000000e+02 2.49437168e-01 2.
10000000e+01]
[4.88000000e+02 2.57000000e+02 1.63028985e-01 2.
20000000e+01]
[1.32000000e+02 2.80000000e+02 3.27448994e-01 2.
30000000e+01]
[4.21000000e+02 8.20000000e+01 7.80053079e-01 2.
40000000e+01]
[4.35000000e+02 8.20000000e+01 8.51261437e-01 2.
50000000e+01]
[4.09000000e+02 7.20000000e+01 5.02051950e-01 2.
60000000e+01]
[4.46000000e+02 7.20000000e+01 7.86910176e-01 2.
70000000e+01]]
[[ 0.          1.          2.          3.          4
.          5.
 6.          7.          8.          10.         13
.          15.
 18.         22.         24.         25.         26
.          27.
 26.03970026 18.          ]]
[array([392., 71.]), array([410., 141.]), array([423
., 207.]), array([471., 62.]), array([462., 136.]),
array([438., 205.])]
Right_elbow: STANDARD

Left_elbow: NOT STANDARD

-----
-----
TThe straightness of Left_elbow: NOT STANDARD
The straightness of Right_elbow: NOT STANDARD
-----
-----

Circle 1 is too shallow
Circle 2 is too shallow
Circle 3 is too shallow
-----

```

-----  
The Compression Depth is NOT STANDARD

-----  
-----  
Round 1 is too fast

Round 2 is too fast

Round 3 is too fast

-----  
-----  
The Compression Frequency is NOT STANDARD

Process finished with exit code 0
